# Supplementary material for: Mapping the structural boundaries of quasiracemate fractional crystallization using 2-substituted diarylamides
Source: Royal Society of Chemistry journal article supplement (doi:10.1039/c7cc01638g), 2017-01-01
Supplement: c7cc01638g1.pdf [file c7cc01638g1.pdf]

Electronic supplementary information for:

## Probing the Shape Space of Molecular Recognition via 2-Substituted Diarylamide Quasiracemates

Ian C. Tinsley, Jacqueline M. Spaniol and Kraig A. Wheeler

*Department of Chemistry, Eastern Illinois University, Charleston, IL 61920, USA. E-mail: kawheeler@eiu.edu; Tel: +1 217 581 3119*

### Electronic Supplementary Information

| Table of Contents                                                                       | Page  |
|-----------------------------------------------------------------------------------------|-------|
| <b>S1</b> - Experimental Details                                                        | 2-7   |
| <b>S2</b> - Hot Stage Thermomicroscopy                                                  | 7-31  |
| <b>S3</b> - X-ray Crystallography – Powder Diffraction                                  | 31-35 |
| <b>S4</b> - X-ray Crystallography – Single-Crystal Diffraction                          | 35-38 |
| <b>S5</b> - <sup>1</sup> H NMR Overlays                                                 | 39-41 |
| <b>S6</b> - Functional Group and Chemical Framework Volume and Surface Area Comparisons | 42-43 |

## S1. Experimental Details

### Synthesis of (S)- and (R)-N-(2-substitutedbenzoyl)methylbenzylamine

**General Considerations.** All chemicals and solvents were purchased from the Aldrich Chemical Co. or Acros Chemicals and used as received without further purification unless stated otherwise.  $^1\text{H}$  NMR and  $^{13}\text{C}$  NMR spectral data were recorded with a 400 MHz Bruker Avance spectrometer using TopSpin v.3.2. They were referenced using the solvent residual signal as internal standard. The chemical shift values are expressed as  $\delta$  values (ppm) and the value of coupling constants ( $J$ ) in Hertz (Hz). The following abbreviations were used for signal multiplicities: s, singlet; d, doublet; dd, doublet of doublets; t, triplet; q, quartet; m, multiplet; and br, broad. The 2-substituted diarylamide derivatives for this study were prepared using a previously reported method starting from either the carboxylic acid or acid chloride.<sup>1</sup> The following general procedure, as described for (R)-N-(2-fluorobenzoyl)methylbenzylamine, was used to generate the homologous series of diarylamides.

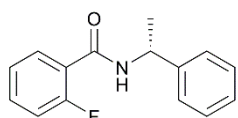

#### (R)-N-(2-Fluorobenzoyl)methylbenzylamine

To a 25mL nitrogen purged 100-mL round-bottom flask containing a stir bar and 2-fluorobenzoic acid (0.8469 g, 6.00 mmol) at 0°C was added 2.2 mL of thionyl chloride (30.0 mmol). The reaction mixture was allowed to warm to room temperature and then refluxed for 2.5 hours to give a homogeneous yellow solution. Excess thionyl chloride was removed by washing the mixture with 15mL of hexanes and the mixture reduced using a mechanical diffusion pump to give a yellow solution. Without further purification, the acid chloride was treated with (R)-(+)- $\alpha$ -methylbenzylamine (1.7993 g, 14.8 mmol) dissolved in 5mL dichloromethane and stirred overnight at room temperature. The reaction mixture was then extracted in succession with 25 mL  $\text{H}_2\text{O}$ , 10 mL saturated  $\text{NaHCO}_3$ , 10 mL 4 M  $\text{HCl}$ , and 10 mL  $\text{H}_2\text{O}$ . The organic layer was dried using anhydrous magnesium sulfate and reduced under *vacuo* to give a solid colorless product (0.6413 g, 43.93% yield).

X-ray quality crystals were obtained *via* slow evaporation at room temperature using a 1:1 hexanes:dichloromethane solution.

Melting point 108-110°C.

$^1\text{H}$  NMR (400 MHz, acetone- $d_6$ ):  $\delta$  8.80 (br s, 1H, N-H), 7.57-7.24 (m, 9H,  $\text{C}_{\text{Ar}}\text{-H}$ ), 5.12 (dq,  $J$  = 6.4 and 6.6 Hz, 1H,  $\text{C}_{\text{sp}^3}\text{-H}$ ), 1.43 (d,  $J$  = 6.4 Hz, 3H,  $\text{CH}_3$ )

$^{13}\text{C}$  NMR (100 MHz, acetone- $d_6$ ):  $\delta$  163.1, 160.2-157.8 (d,  $J$  = 247.1 Hz), 144.6, 132.1-132.0 (d,  $J$  = 8.2 Hz), 129.9, 128.3, 126.7, 126.0, 124.8-124.6 (d,  $J$  = 15.3 Hz), 124.4-124.3 (d,  $J$  = 15.1 Hz), 116.1- 115.9 (d,  $J$  = 21.9 Hz), 48.6, 22.5.

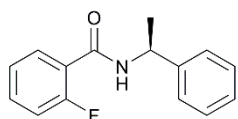

#### (S)-N-(2-Fluorobenzoyl)methylbenzylamine

Melting point 108-110°C, 85.89% yield.

1. S. L. Fomulu, M. S. Hendi, R. E. Davis and K. A. Wheeler, *Cryst. Growth Des.*, 2002, **2**, 637.

$^1\text{H}$  NMR (400 MHz, acetone- $d_6$ ):  $\delta$  7.81-7.19 (m, 10H, N-H,  $\text{C}_{\text{Ar}}\text{-H}$ ), 5.32 (dq,  $J = 7.1$  and  $7.2$  Hz, 1H,  $\text{C}_{\text{sp}^3}\text{-H}$ ), 1.58 (d,  $J = 7.1$ , 3H,  $\text{CH}_3$ ).

$^{13}\text{C}$  NMR (100 MHz, acetone- $d_6$ ):  $\delta$  162.6, 161.2-158.8(d,  $J = 246.3$  Hz), 144.4, 132.6-132.5 (d,  $J = 8.7$  Hz), 130.8, 128.4, 126.8, 126.1, 124.5-124.4 (d,  $J = 3.4$  Hz), 123.7-123.6 (d,  $J = 13.9$  Hz), 116.0-115.8 (d,  $J = 23.3$  Hz), 49.2, 21.8.

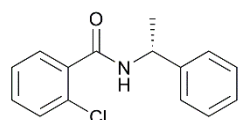

**(R)-N-(2-Chlorobenzoyl)methylbenzylamine**

Melting point 110-112°C, 68.25% yield.

$^1\text{H}$  NMR (400 MHz, acetone- $d_6$ ):  $\delta$  7.92 (br s, 1H, N-H), 7.52-7.24 (m, 9H,  $\text{C}_{\text{Ar}}\text{-H}$ ), 5.29 (dq,  $J = 7.1$  and  $7.1$  Hz, 1H,  $\text{C}_{\text{sp}^3}\text{-H}$ ), 1.57 (d,  $J = 7.1$  Hz, 3H,  $\text{CH}_3$ )

$^{13}\text{C}$  NMR (100 MHz, acetone- $d_6$ ):  $\delta$  165.5, 144.4, 137.3, 130.6, 130.5, 129.7, 129.0, 128.3, 126.9, 126.8, 126.2, 49.0, 21.7.

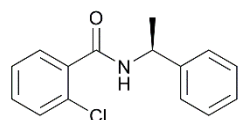

**(S)-N-(2-Chlorobenzoyl)methylbenzylamine**

Previously prepared by S. Fomulu with spectroscopic data provided in reference 1.

Melting point 110-112°C

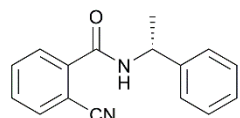

**(R)-N-(2-Cyanobenzoyl)methylbenzylamine**

Melting point 138-140°C, 84.11% yield.

$^1\text{H}$  NMR (400 MHz, acetone- $d_6$ ):  $\delta$  8.28 (br s, 1H, N-H), 7.87-7.22 (m, 9H,  $\text{C}_{\text{Ar}}\text{-H}$ ), 5.31 (dq,  $J = 7.1$  and  $7.1$  Hz, 1H,  $\text{C}_{\text{sp}^3}\text{-H}$ ), 1.59 (d,  $J = 7.1$  Hz, 3H,  $\text{CH}_3$ ).

$^{13}\text{C}$  NMR (100 MHz, acetone- $d_6$ ):  $\delta$  164.5, 144.1, 139.6, 133.9, 132.6, 130.7, 128.4, 126.9, 126.2, 122.9, 117.3, 111.1, 49.2, 21.5.

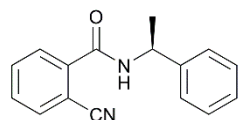

**(S)-N-(2-Cyanobenzoyl)methylbenzylamine**

Melting point 138-140°C, 34.58% yield.

$^1\text{H}$  NMR (400 MHz, acetone- $d_6$ ):  $\delta$  8.23 (br s, 1H, N-H), 7.87-7.24 (m, 9H,  $\text{C}_{\text{Ar}}\text{-H}$ ), 5.31 (dq,  $J = 7.1$  and  $7.1$  Hz, 1H,  $\text{C}_{\text{sp}^3}\text{-H}$ ), 1.59 (d,  $J = 7.0$  Hz, 3H,  $\text{CH}_3$ ).

$^{13}\text{C}$  NMR (100 MHz, acetone- $d_6$ ):  $\delta$  164.6, 144.1, 139.6, 133.9, 132.6, 130.7, 128.4, 126.9, 126.3, 122.5, 117.3, 111.1, 49.3, 21.6.

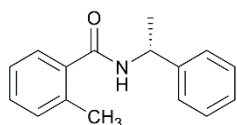

**(R)-N-(2-Methylbenzoyl)methylbenzylamine**

Melting point 110-112°C, 53.24% yield.

$^1\text{H}$  NMR (400 MHz, acetone- $d_6$ ):  $\delta$  7.82 (br s, 1H, N-H), 7.50-7.12 (m, 9H,  $\text{C}_{\text{Ar}}\text{-H}$ ), 5.29 (dq,  $J$  = 7.0 and 7.3 Hz, 1H,  $\text{C}_{\text{sp}^3}\text{-H}$ ), 2.36 (s, 3H,  $\text{CH}_3$ ), 1.56 (d,  $J$  = 7.0 Hz, 3H,  $\text{CH}_3$ ).

$^{13}\text{C}$  NMR (100 MHz, acetone- $d_6$ ):  $\delta$  168.5, 144.9, 137.4, 135.7, 130.4, 129.2, 128.3, 126.9, 126.7, 126.2, 125.4, 48.7, 21.8, 19.0.

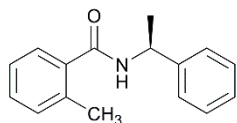

**(S)-N-(2-Methylbenzoyl)methylbenzylamine**

Melting point 110-112°C, 89.23% yield.

$^1\text{H}$  NMR (400 MHz, acetone- $d_6$ ):  $\delta$  7.77 (br s, 1H, N-H), 7.50-7.17 (m, 9H,  $\text{C}_{\text{Ar}}\text{-H}$ ), 5.30 (dq,  $J$  = 7.5 and 7.5 Hz, 1H,  $\text{C}_{\text{sp}^3}\text{-H}$ ), 2.36 (s, 3H,  $\text{CH}_3$ ), 1.56 (d,  $J$  = 7.5 Hz, 3H,  $\text{CH}_3$ ).

$^{13}\text{C}$  NMR (100 MHz, acetone- $d_6$ ):  $\delta$  168.3, 144.8, 137.4, 135.7, 130.4, 129.2, 128.3, 126.9, 126.7, 126.2, 125.4, 48.6, 21.7, 18.9.

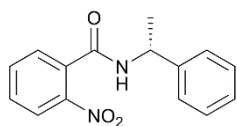

**(R)-N-(2-Nitrobenzoyl)methylbenzylamine**

Melting point 168-171°C, 30.44% yield.

$^1\text{H}$  NMR (400 MHz, acetone- $d_6$ ):  $\delta$  8.17 (br s, 1H, N-H), 8.03-7.25 (m, 9H,  $\text{C}_{\text{Ar}}\text{-H}$ ), 5.28 (dq,  $J$  = 7.0 and 7.2 Hz, 1H,  $\text{C}_{\text{sp}^3}\text{-H}$ ), 1.58 (d,  $J$  = 7.0 Hz, 3H,  $\text{CH}_3$ ).

$^{13}\text{C}$  NMR (100 MHz, acetone- $d_6$ ):  $\delta$  164.9, 147.4, 144.0, 142.2, 133.3, 130.4, 129.0, 128.3, 126.9, 126.2, 124.0, 49.0, 21.4.

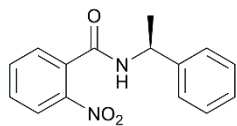

**(S)-N-(2-Nitrobenzoyl)methylbenzylamine**

Melting point 168-171°C, 82.78% yield.

$^1\text{H}$  NMR (400 MHz, acetone- $d_6$ ):  $\delta$  8.19 (br s, 1H, N-H), 8.03-7.25 (m, 9H,  $\text{C}_{\text{Ar}}\text{-H}$ ), 5.28 (q,  $J$  = 7.0 and 7.2 Hz, 1H,  $\text{C}_{\text{sp}^3}\text{-H}$ ), 1.58 (d,  $J$  = 7.0 Hz, 3H,  $\text{CH}_3$ ).

$^{13}\text{C}$  NMR (100 MHz, acetone- $d_6$ ):  $\delta$  164.9, 148.0, 147.4, 144.0, 133.3, 130.4, 129.0, 128.3, 126.9, 126.3, 124.0, 49.0, 21.4.

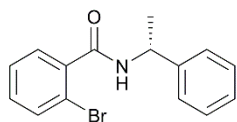

**(R)-N-(2-Bromobenzoyl)methylbenzylamine**

Previously prepared by S. Fomulu with spectroscopic data provided in reference 1.

Melting point 117-121°C

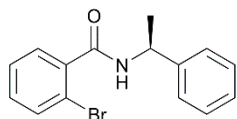

**(S)-N-(2-Bromobenzoyl)methylbenzylamine**

Previously prepared by S. Fomulu with spectroscopic data provided in reference 1.

Melting point 117-121°C

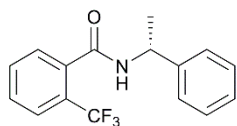

**(R)-N-(2-Trifluorobenzoyl)methylbenzylamine**

Melting point 140-143°C, 64.71% yield.

$^1\text{H}$  NMR (400 MHz, acetone- $d_6$ ):  $\delta$  8.00 (br s, 1H, N-H), 7.77-7.25 (m, 9H,  $\text{C}_{\text{Ar}}\text{-H}$ ), 5.29 (q,  $J = 7.0$  and  $7.0$  Hz, 1H,  $\text{C}_{\text{sp}3}\text{-H}$ ), 1.56 (d,  $J = 7.0$  Hz, 3H,  $\text{CH}_3$ )

$^{13}\text{C}$  NMR (100 MHz, acetone- $d_6$ ):  $\delta$  166.3, 144.2, 137.0, 132.1, 129.4, 128.5, 128.3, 126.9, 126.2, 126.1, 125.4, 122.7, 49.0, 21.5.

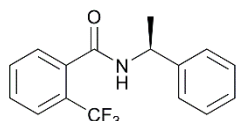

**(S)-N-(2-Trifluorobenzoyl)methylbenzylamine**

Melting point 140-143°C, 84.13% yield.

$^1\text{H}$  NMR (400 MHz, acetone- $d_6$ ):  $\delta$  8.00 (br s, 1H, N-H), 7.77-7.25 (m, 9H,  $\text{C}_{\text{Ar}}\text{-H}$ ), 5.30 (q,  $J = 7.0$  and  $7.0$  Hz, 1H,  $\text{C}_{\text{sp}3}\text{-H}$ ), 1.56 (d,  $J = 7.0$  Hz, 3H,  $\text{CH}_3$ ).

$^{13}\text{C}$  NMR (100 MHz, acetone- $d_6$ ):  $\delta$  166.3, 144.2, 137.0, 132.1, 129.4, 128.5, 128.3, 127.2, 126.9, 126.2, 125.4, 122.7, 48.6, 21.5.

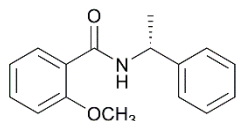

**(R)-N-(2-Methoxybenzoyl)methylbenzylamine**

Melting point 78-81°C, 86.85% yield.

$^1\text{H}$  NMR (400 MHz, acetone- $d_6$ ):  $\delta$  8.34 (br s, 1H, N-H), 8.06-7.05 (m, 9H,  $\text{C}_{\text{Ar}}\text{-H}$ ), 5.32 (dq,  $J = 7.0$  and  $7.5$  Hz, 1H,  $\text{C}_{\text{sp}3}\text{-H}$ ), 4.00 (s, 3H, O- $\text{CH}_3$ ), 1.56 (d,  $J = 7.0$  Hz, 3H,  $\text{CH}_3$ ).

$^{13}\text{C}$  NMR (100 MHz, acetone- $d_6$ ):  $\delta$  163.8, 157.7, 144.8, 132.5, 131.5, 128.4, 126.8, 126.0, 122.4, 120.8, 111.9, 55.7, 48.9, 22.2.

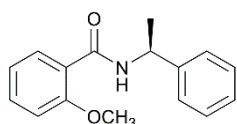

**(S)-N-(2-Methoxybenzoyl)methylbenzylamine**

Melting point 78-81°C, 75.82% yield.

$^1\text{H}$  NMR (400 MHz, acetone- $d_6$ ):  $\delta$  8.42 (br d,  $J = 6.72$ , N-H), 8.18-7.06 (m, 9H,  $\text{C}_{\text{Ar}}\text{-H}$ ), 5.40 (dq,  $J = 7.0$  and  $7.1$  Hz, 1H,  $\text{C}_{\text{sp}3}\text{-H}$ ), 3.93 (s, 3H, O- $\text{CH}_3$ ), 1.61 (d,  $J = 7.0$  Hz, 3H,  $\text{CH}_3$ ).

$^{13}\text{C}$  NMR (100 MHz, acetone- $d_6$ ):  $\delta$  163.7, 157.7, 144.8, 132.5, 131.5, 128.4, 126.8, 126.1, 122.4, 120.8, 111.8, 55.6, 48.9, 22.2.

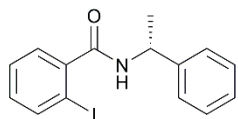

**(R)-N-(2-Iodobenzoyl)methylbenzylamine**

Melting point 137-140°C, 66.17% yield.

$^1\text{H}$  NMR (400 MHz, acetone- $d_6$ ):  $\delta$  7.88-7.14 (m, 10H, N-H,  $\text{C}_{\text{Ar}}\text{-H}$ ), 5.28 (dq,  $J = 7.0$  and 7.5 Hz, 1H,  $\text{C}_{\text{sp}3}\text{-H}$ ), 1.59 (d,  $J = 7.0$  Hz, 3H,  $\text{CH}_3$ ).

$^{13}\text{C}$  NMR (100 MHz, acetone- $d_6$ ):  $\delta$  167.9, 144.1, 143.4, 139.4, 132.5, 130.4, 127.9, 127.8, 126.7, 126.3, 92.3, 48.8, 21.5.

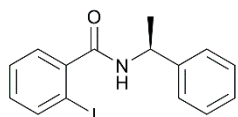

**(S)-N-(2-Iodobenzoyl)methylbenzylamine**

Melting point 137-140°C, 42.20% yield.

$^1\text{H}$  NMR (400 MHz, acetone- $d_6$ ):  $\delta$  7.88-16 (m, 10H, N-H,  $\text{C}_{\text{Ar}}\text{-H}$ ), 5.28 (dq,  $J=7.0$  and 7.1 Hz, 1H), 1.59 (d,  $J=7.0$ , 3H,  $\text{CH}_3$ ).

$^{13}\text{C}$  NMR (100 MHz, acetone- $d_6$ ):  $\delta$  168.0, 144.2, 143.5, 139.5, 132.6, 130.5, 128.3, 128.0, 126.8, 126.3, 92.3, 48.9, 21.6.

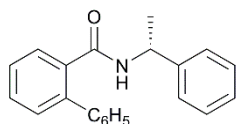

**(R)-N-(2-Phenylbenzoyl)methylbenzylamine**

Further purification of (R)- $\text{C}_6\text{H}_5$  was achieved by washing the sample with hexanes. Melting point 110-114°C, 63.24% yield.

$^1\text{H}$  NMR (400 MHz, acetone- $d_6$ ):  $\delta$  7.52-7.16 (m, 13H,  $\text{C}_{\text{Ar}}\text{-H}$ ), 5.07 (dq,  $J = 7.0$  and 7.5 Hz, 1H,  $\text{C}_{\text{sp}3}\text{-H}$ ), 1.27 (d,  $J = 7.0$  Hz, 3H,  $\text{CH}_3$ ).

$^{13}\text{C}$  NMR (100 MHz, acetone- $d_6$ ):  $\delta$  168.2, 144.2, 140.6, 139.6, 137.5, 129.8, 129.3, 128.7, 128.1, 128.0, 127.2, 127.0, 126.5, 126.1, 48.6, 21.3, 13.4.

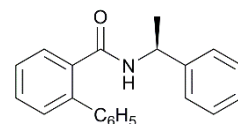

**(S)-N-(2-Phenylbenzoyl)methylbenzylamine**

Further purification of (S)- $\text{C}_6\text{H}_5$  was achieved by washing the sample with hexanes. Melting point 110-114°C, 19.78% yield.

$^1\text{H}$  NMR (400 MHz, acetone- $d_6$ ):  $\delta$  7.52-7.16 (m, 13H,  $\text{C}_{\text{Ar}}\text{-H}$ ), 5.07 (dq,  $J = 7.0$  and 7.2 Hz, 1H,  $\text{C}_{\text{sp}3}\text{-H}$ ), 1.27 (d,  $J = 7.0$  Hz, 3H,  $\text{CH}_3$ ).

$^{13}\text{C}$  NMR (100 MHz, acetone- $d_6$ ):  $\delta$  168.2, 144.2, 140.7, 139.6, 137.5, 129.8, 129.3, 128.7, 128.2, 128.0, 127.2, 127.0, 126.6, 126.1, 48.6, 21.3, 13.4.

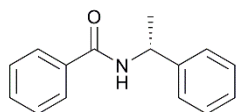

**(R)-N-(Benzoyl)methylbenzylamine**

Melting point 132-136°C, 68.38% yield.

$^1\text{H}$  NMR (400 MHz, acetone- $d_6$ ):  $\delta$  7.80-7.75 (m, 2H,  $\text{C}_{\text{Ar}}\text{-H}$ ), 7.53-7.26 (m, 8H,  $\text{C}_{\text{Ar}}\text{-H}$ ), 5.35 (dq,  $J = 6.9$  and  $7.1$  Hz, 1H,  $\text{C}_{\text{sp}3}\text{-H}$ ), 1.62 (d,  $J = 7.1$  Hz, 3H,  $\text{CH}_3$ ).

$^{13}\text{C}$  NMR (100 MHz, acetone- $d_6$ ):  $\delta$  168.2, 141.6, 134.6, 131.5, 128.8, 128.6, 127.5, 126.9, 126.3, 48.2, 21.7.

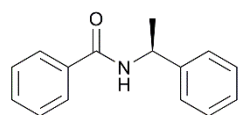

**(S)-N-(Benzoyl)methylbenzylamine**

Melting point 132-136°C, 70.03% yield.

$^1\text{H}$  NMR (400 MHz, acetone- $d_6$ ):  $\delta$  7.81-7.76 (m, 2H,  $\text{C}_{\text{Ar}}\text{-H}$ ), 7.53-7.25 (m, 8H,  $\text{C}_{\text{Ar}}\text{-H}$ ), 5.34 (dq,  $J = 7.0$  and  $7.1$  Hz, 1H,  $\text{C}_{\text{sp}3}\text{-H}$ ), 1.62 (d,  $J = 7.1$  Hz, 3H,  $\text{CH}_3$ ).

$^{13}\text{C}$  NMR (100 MHz, acetone- $d_6$ ):  $\delta$  168.2, 141.5, 134.6, 131.3, 128.7, 128.5, 127.5, 126.9, 126.3, 48.4, 21.7.

## S2. Hot-Stage Microscopy

The hot-stage microscopy experiments were performed using an optical polarizing microscope (*Olympus SZX10*) equipped with an *Instec HCS 302* hot-stage connected to an *Instec mK2000* temperature controller. Micrographs were collected under a range of magnifications (3.0-6.3x) using an attached video camera. The hot-stage was controlled by the WINDV software package (V1.0.120820). Pairs of diarylamide components were analyzed for cocrystallization behavior. Samples were prepared using standard glass microscope slides and cover slips. The higher melting point component was delivered first by heating the sample to the melting point temperature drawing the sample under the cover slip. Upon cooling, the lower melting point component was then delivered in a similar fashion to create a contact interface between the two samples. These bimolecular samples were heated at a ramp rate of 2-5°C/min until complete melting of the sample occurred. All combinations (11 racemates and 55 quasiracemates) were processed using the video-assisted hot stage technique.

### Hot-Stage Images of Racemic and Quasiracemic Pairs

#### Racemic Mixtures

(R)-H (left)

(S)-H (right)

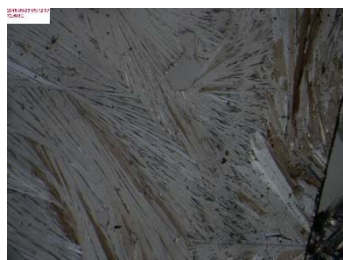

72.7°

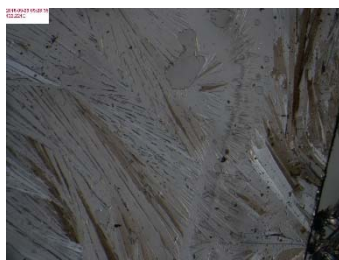

122.2°

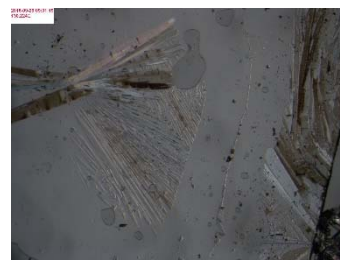

130.2°

(*R*)-F  
(*S*)-F

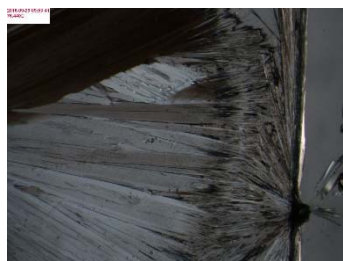

76.4°

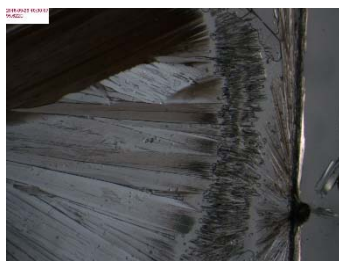

95.6°

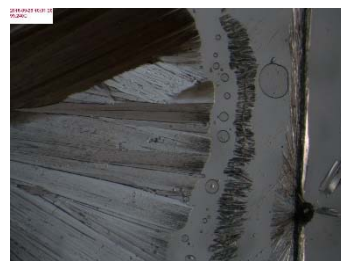

99.2°

(*S*)-Cl  
(*R*)-Cl

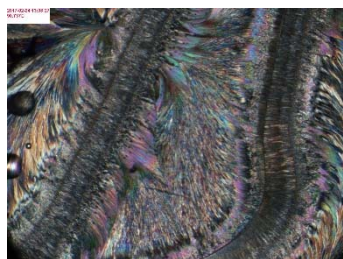

90.7°

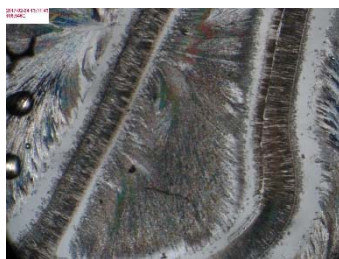

108.9°

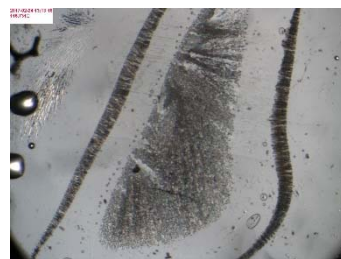

116.7°

(*S*)-CN  
(*R*)-CN

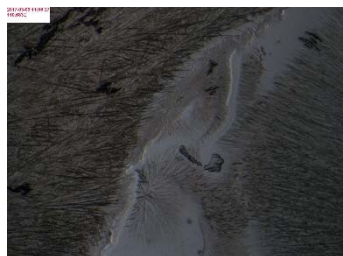

110.683°

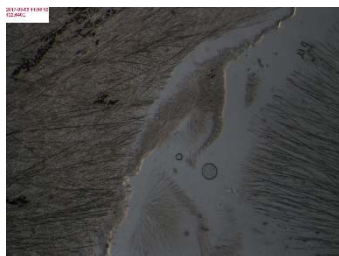

122.640°

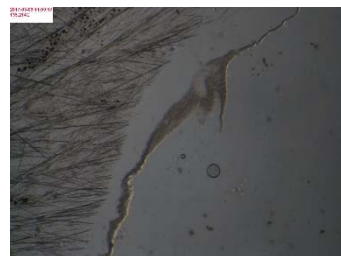

135.214°

(*R*)-Me  
(*S*)-Me

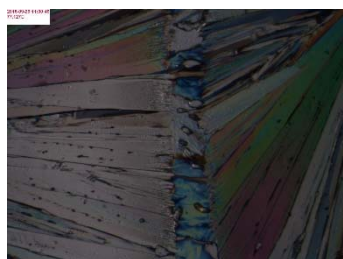

77.1°

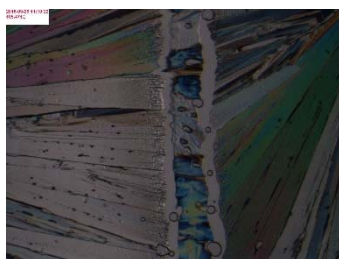

105.5°

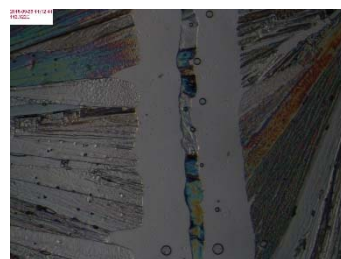

112.3°

(*R*)-NO<sub>2</sub>  
(*S*)-NO<sub>2</sub>

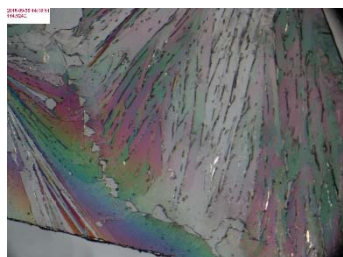

114.9°

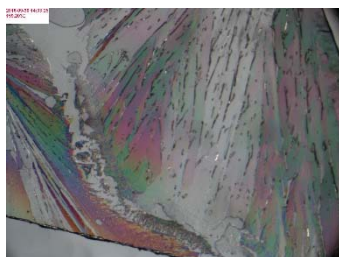

159.2°

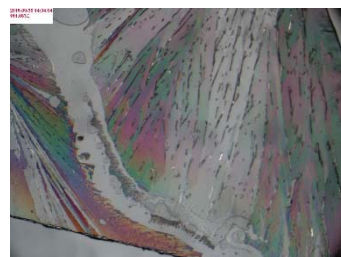

161.1°

(*R*)-Br  
(*S*)-Br

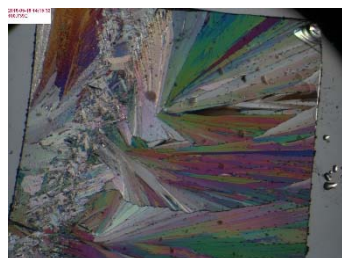

100.7°

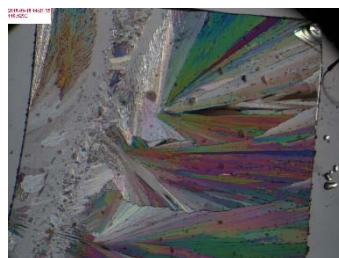

110.5°

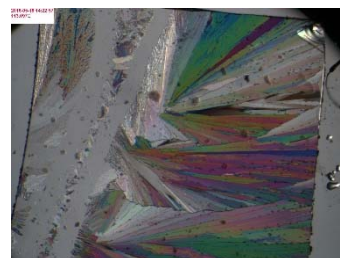

113.1°

(*R*)-CF<sub>3</sub>  
(*S*)-CF<sub>3</sub>

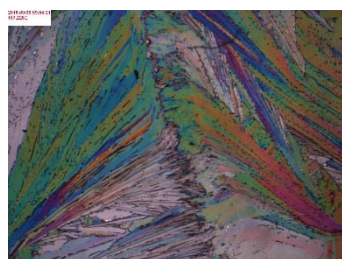

107.2°

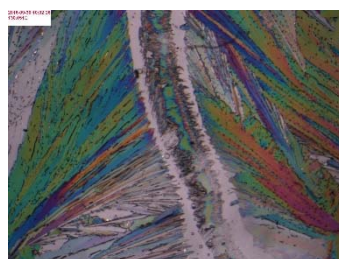

130.1°

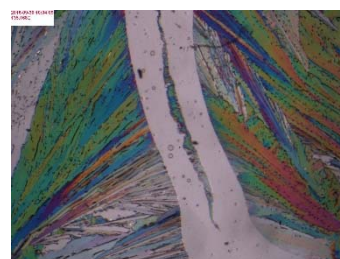

135.2°

(*S*)-OMe  
(*R*)-OMe

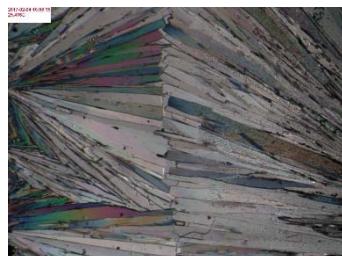

25.5°

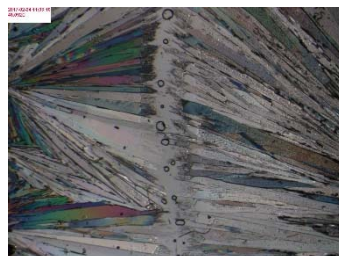

48.1°

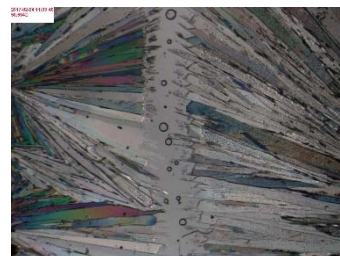

50.6°

(*R*)-I  
(*S*)-I

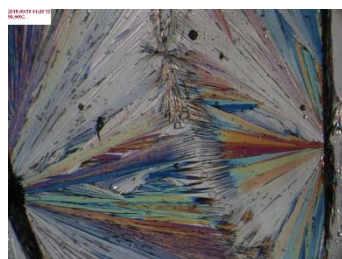

98.5°

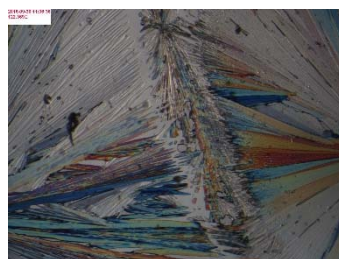

122.4°

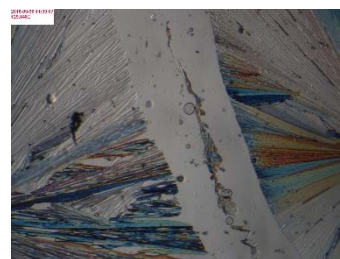

129.8°

(*S*)-Phenyl  
(*R*)-Phenyl

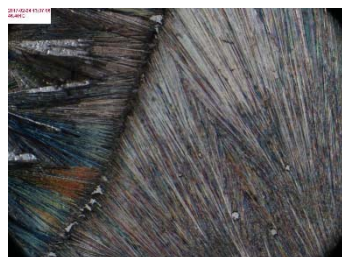

46.4°

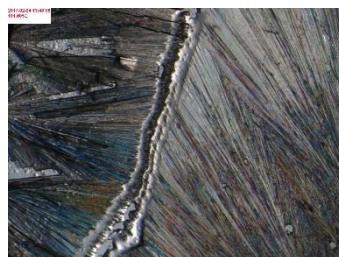

101.6°

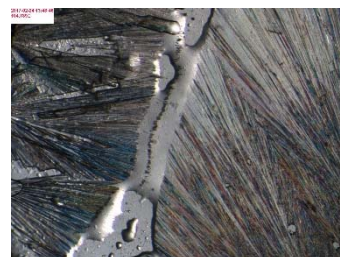

104.8°

## Hydrogen

(S)-H  
(left)

(R)-F  
(right)

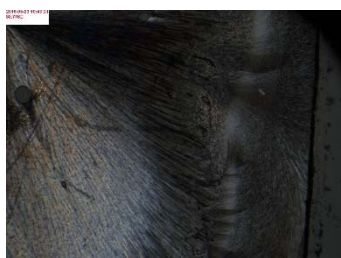

80.8°

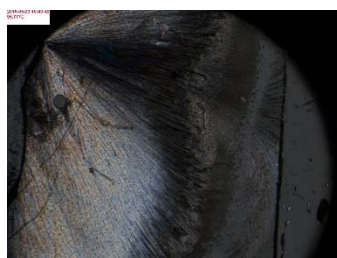

95.8°

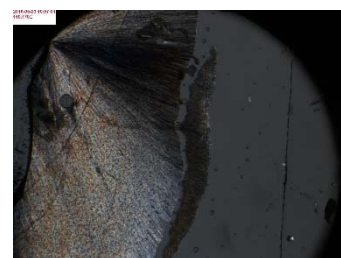

110.2°

(S)-Cl  
(R)-H

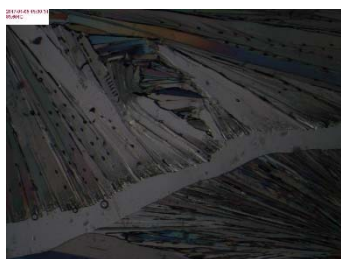

89.6°

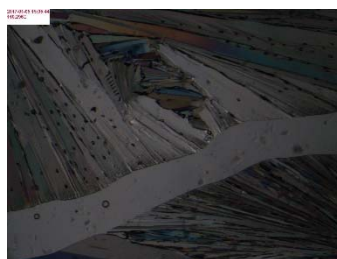

110.3°

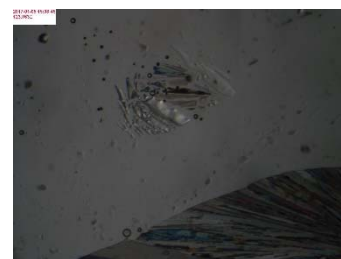

123.8°

(S)-H  
(R)-CN

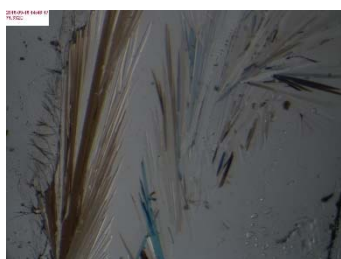

71.3°

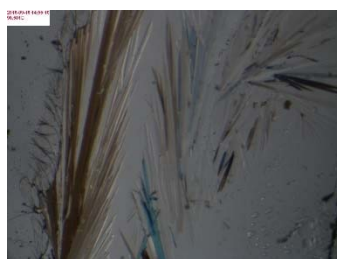

98.6°

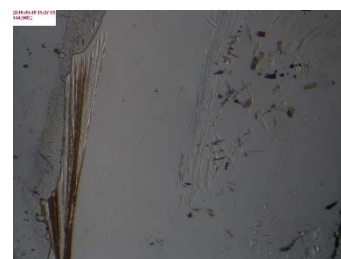

145.0°

(R)-H  
(S)-Me

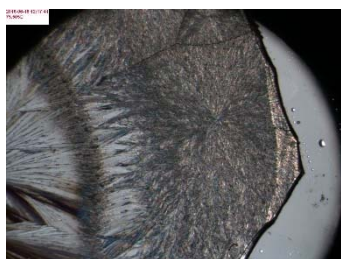

75.5°

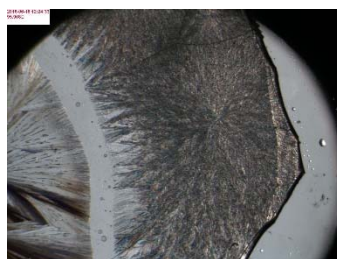

95.9°

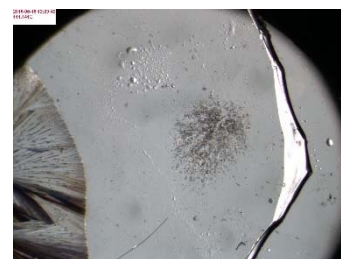

111.1°

(S)-H  
(R)-NO<sub>2</sub>

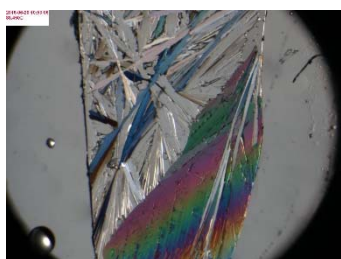

88.5°

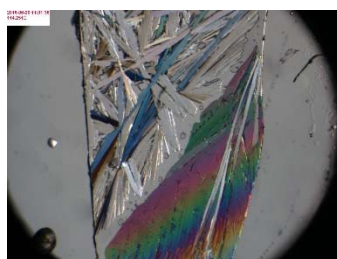

114.3°

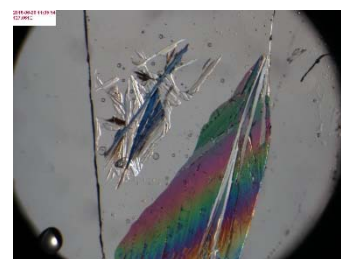

127.1°

(*R*)-H  
(*S*)-Br

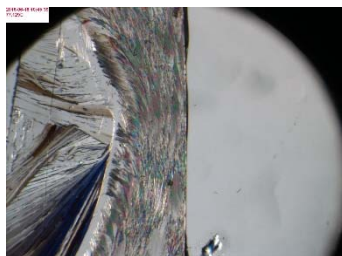

77.1°

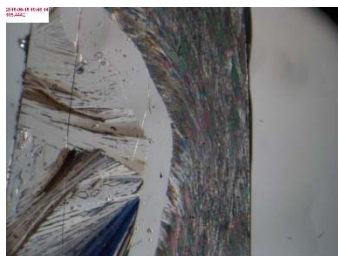

105.4°

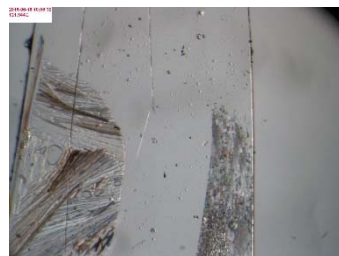

121.9°

(*S*)-H  
(*R*)-CF<sub>3</sub>

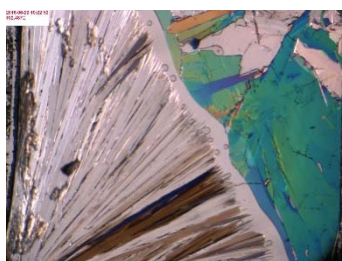

102.5°

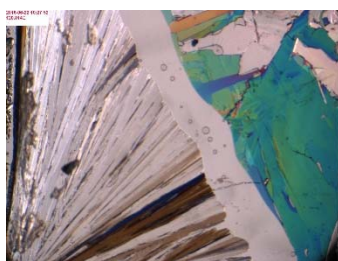

120.8°

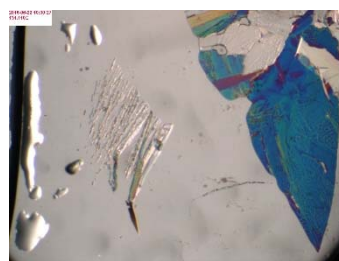

131.1°

(*S*)-H  
(*R*)-OMe

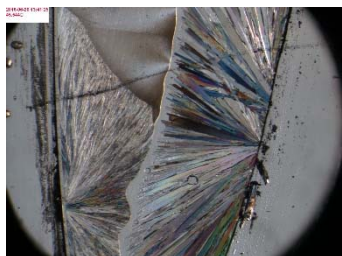

45.5°

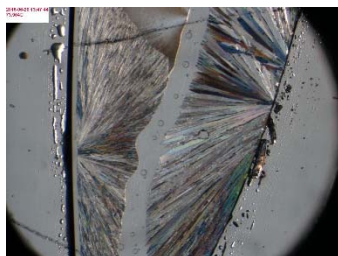

73.9°

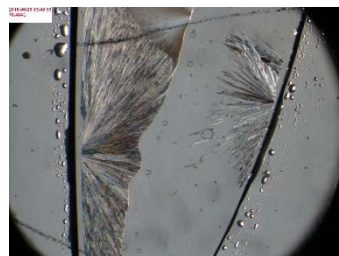

78.5°

(*R*)-H  
(*S*)-I

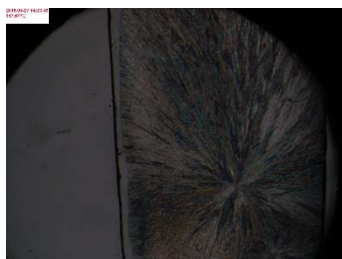

117.7°

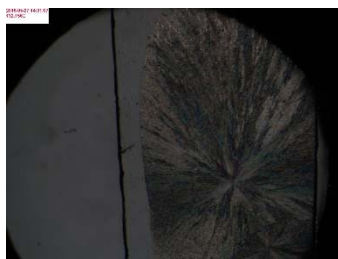

132.2°

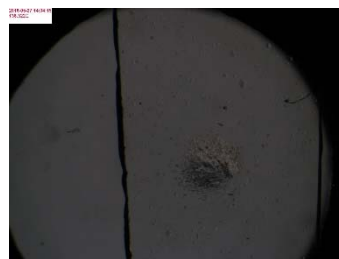

138.3°

(*R*)-H  
(*S*)-Phenyl

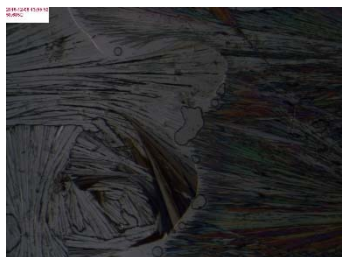

50.7°

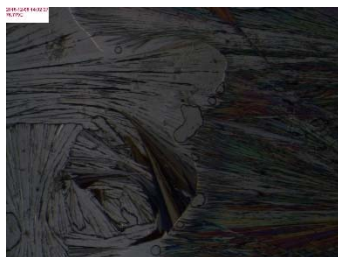

76.8°

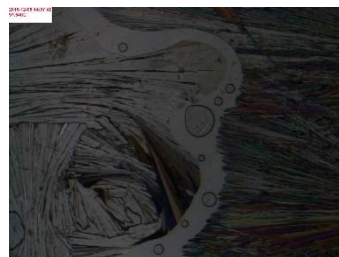

97.5°

## Fluoride

(*S*)-Cl  
(*R*)-F

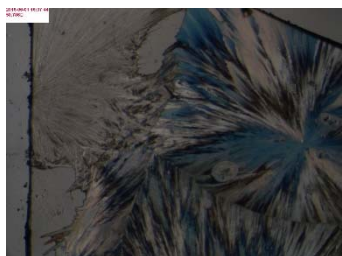

50.8°

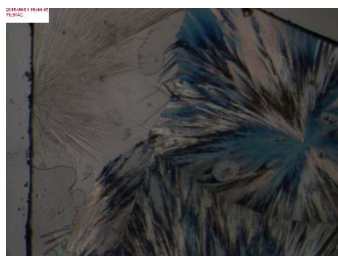

71.5°

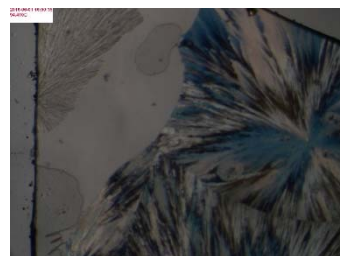

94.4°

(*S*)-F  
(*R*)-CN

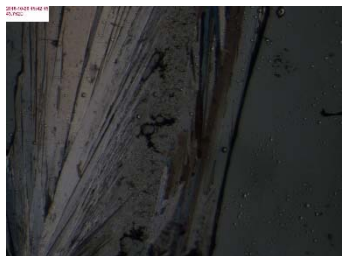

43.8°

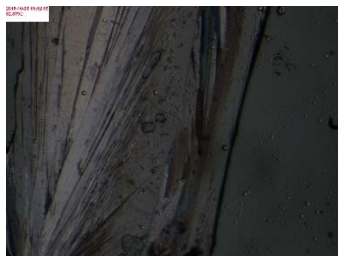

82.9°

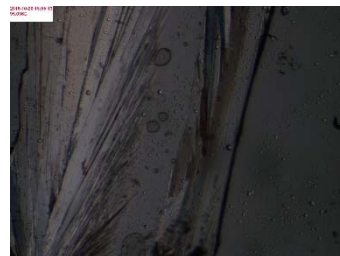

95.0°

(*S*)-Me  
(*R*)-F

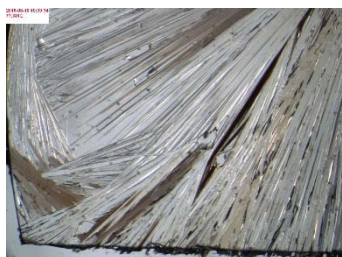

77.4°

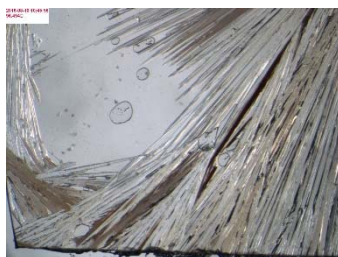

96.5°

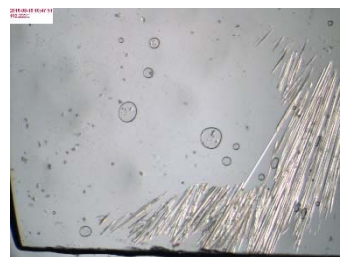

102.2°

(*S*)-NO<sub>2</sub>  
(*R*)-F

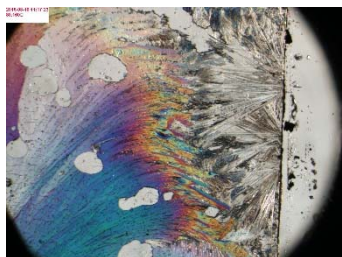

80.2°

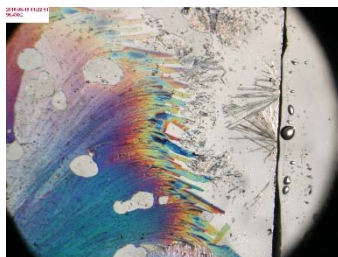

96.4°

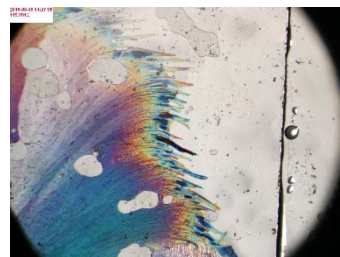

119.8°

(*S*)-Br  
(*R*)-F

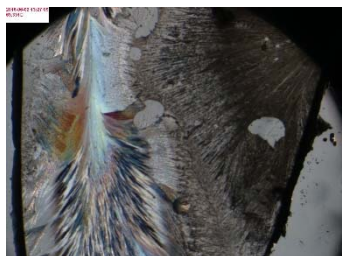

69.3°

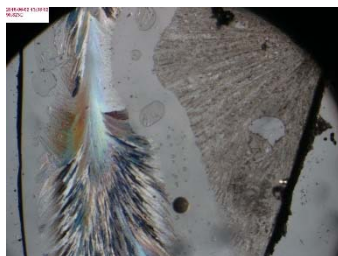

90.8°

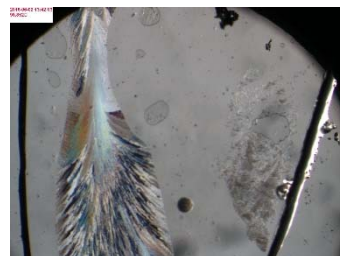

98.9°

(*S*)-CF<sub>3</sub>  
(*R*)-F

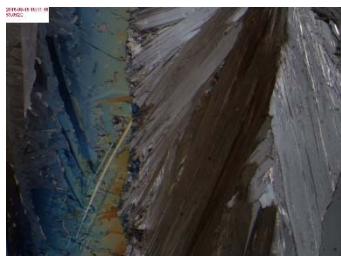

53.1°

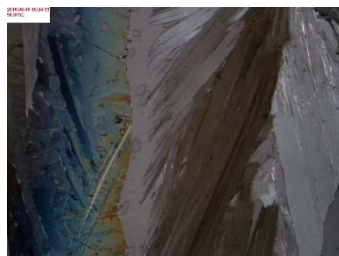

91.8°

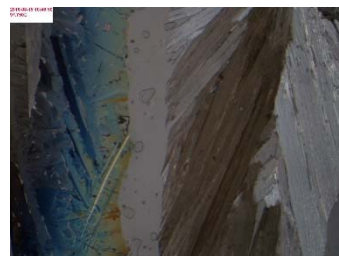

97.8°

(*S*)-OMe  
(*R*)-F

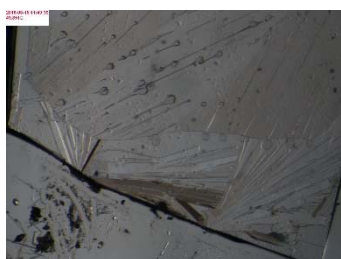

49.9°

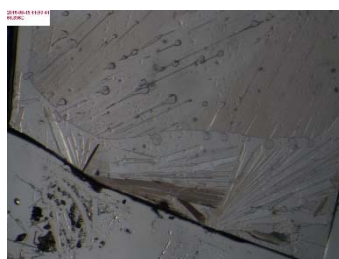

61.8°

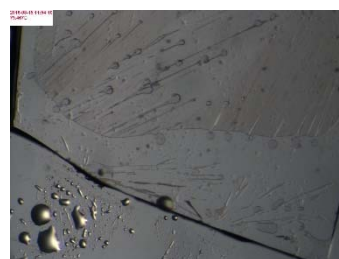

79.5°

(*S*)-I  
(*R*)-F

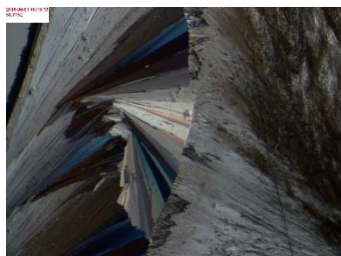

58.7°

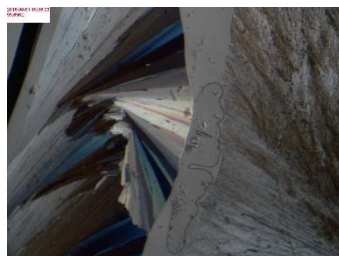

99.7°

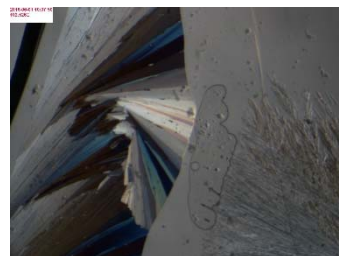

102.5°

(*R*)-F  
(*S*)-Phenyl

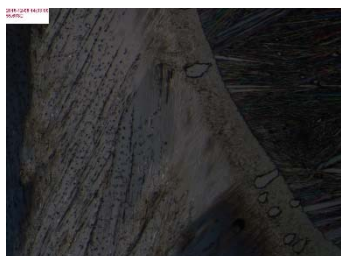

55.7°

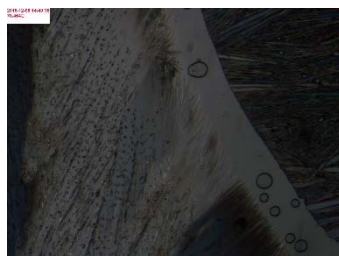

78.5°

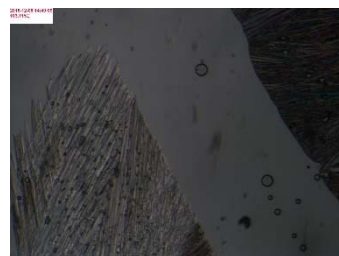

103.7°

## Chloride

(*S*)-Cl  
(*R*)-CN

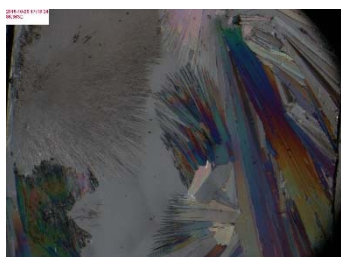

86.4°

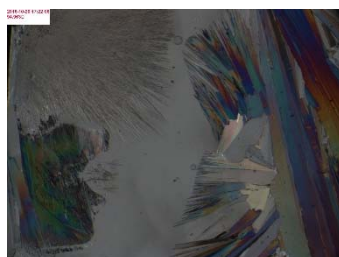

95.0°

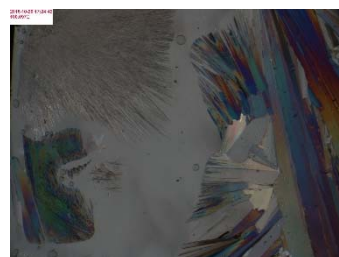

100.1°

(*S*)-Cl  
(*R*)-Me

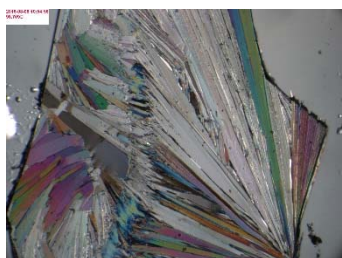

98.7°

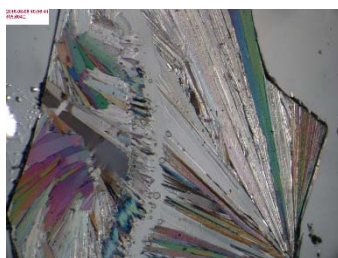

105.6°

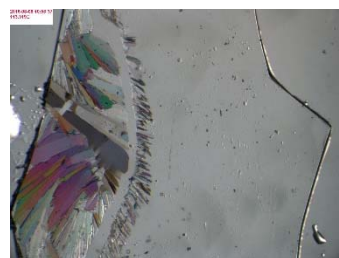

113.3°

(*S*)-Cl  
(*R*)-Nitro

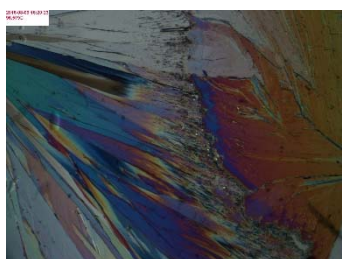

96.5°

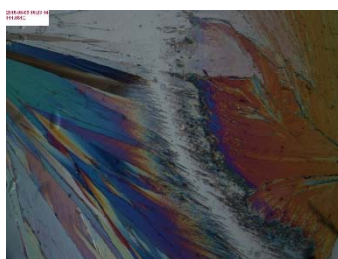

111.1°

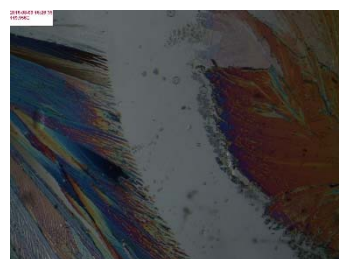

112.0°

(*S*)-Cl  
(*R*)-Br

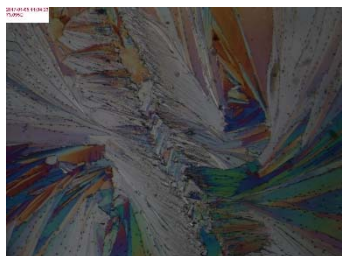

73.1°

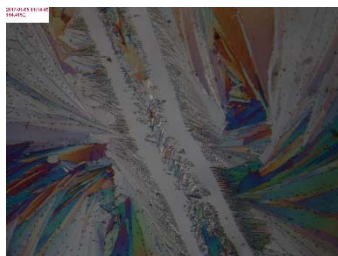

114.4°

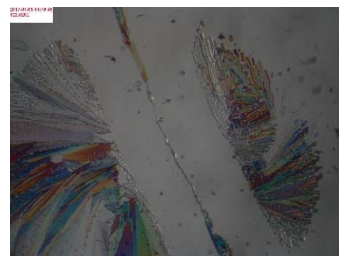

122.0°

(*S*)-Cl  
(*R*)-CF<sub>3</sub>

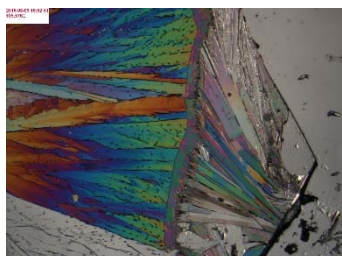

105.6°

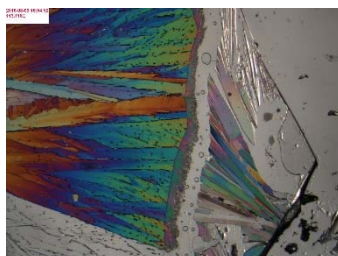

113.7°

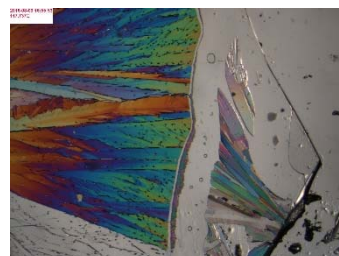

117.7°

(*R*)-Cl  
(*S*)-OMe

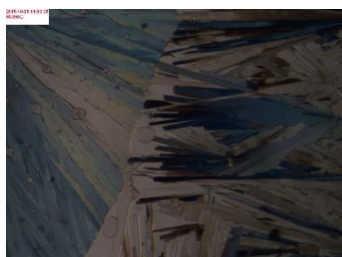

50.9°

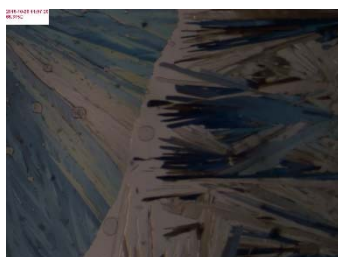

66.3°

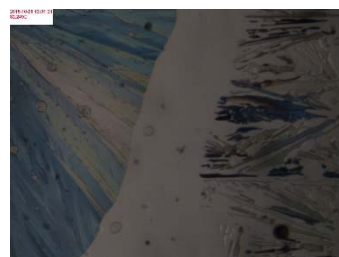

82.2°

(S)-I  
(R)-Cl

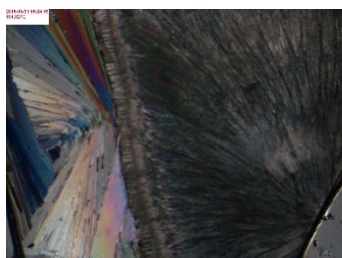

101.8°

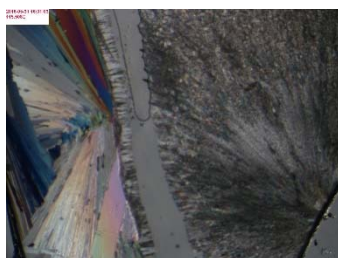

115.5°

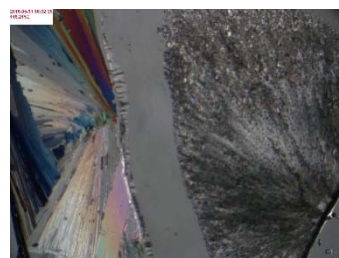

118.2°

(R)-Cl  
(S)-Phenyl

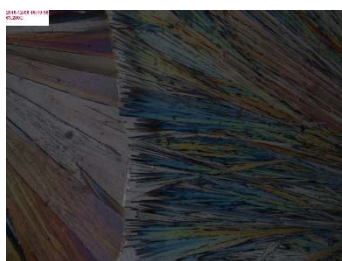

63.3°

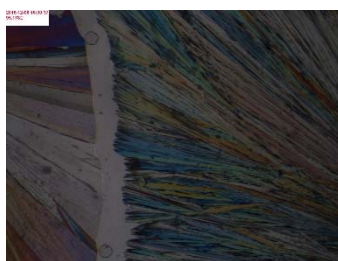

95.2°

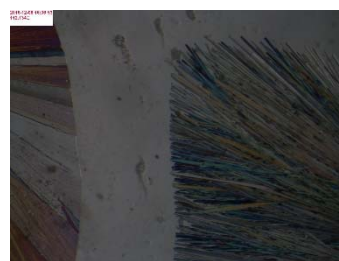

112.1°

## Cyano

(S)-Me  
(R)-CN

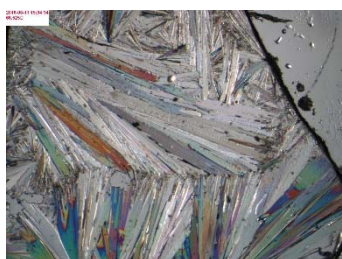

66.5°

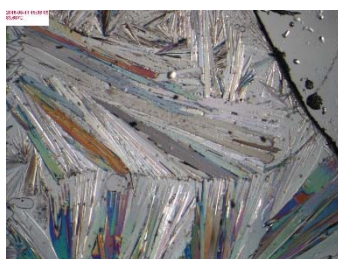

83.7°

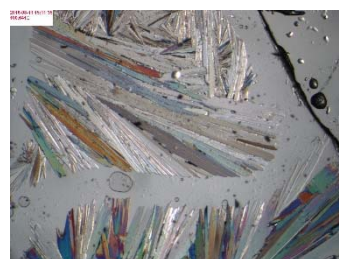

100.6°

(R)-CN  
(S)-Nitro

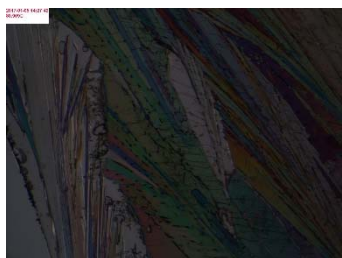

80.9°

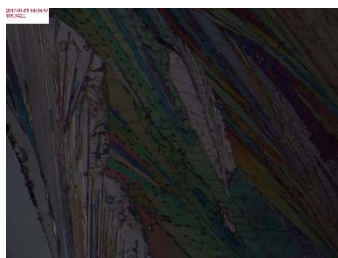

109.7°

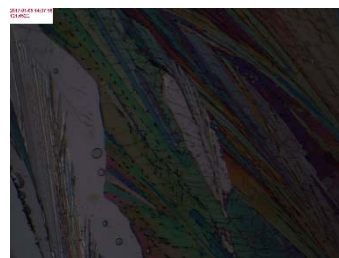

121.7°

(S)-Br  
(R)-CN

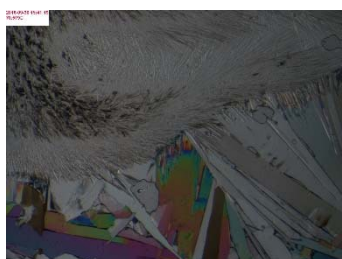

70.5°

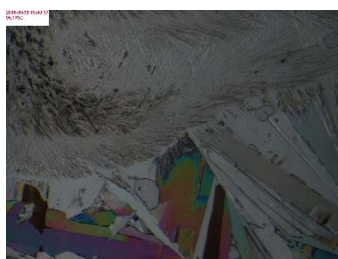

95.2°

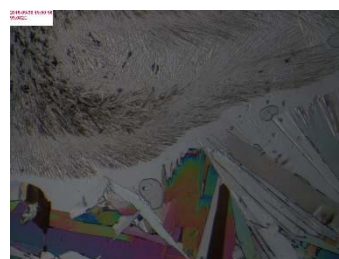

99.1°

(*S*)-CF<sub>3</sub>  
(*R*)-CN

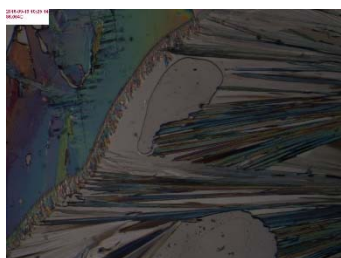

86.0°

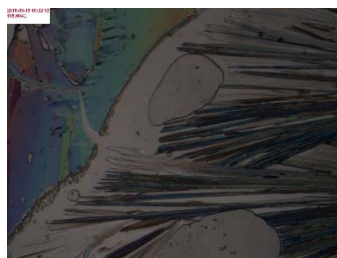

108.6°

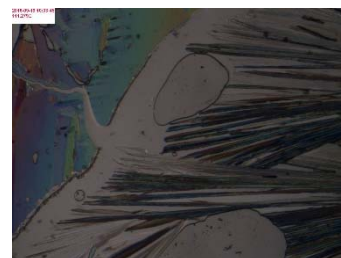

111.3°

(*R*)-CN  
(*S*)-OMe

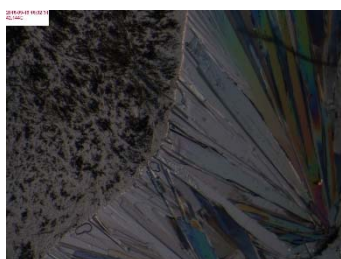

42.1°

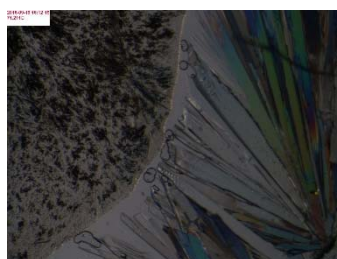

71.2°

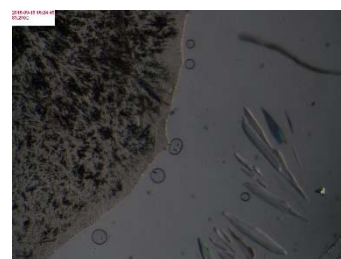

83.2°

(*S*)-I  
(*R*)-CN

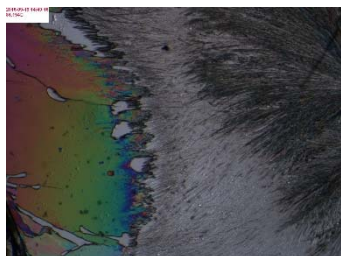

81.2°

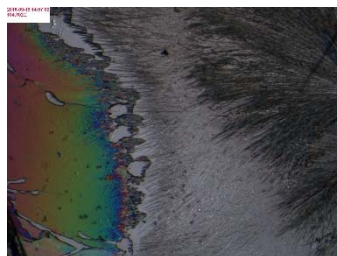

104.7°

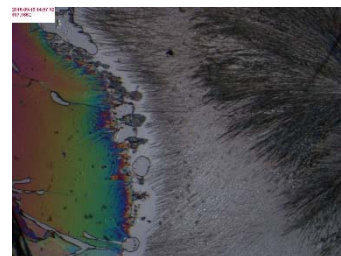

107.2°

(*S*)-Phenyl  
(*R*)-CN

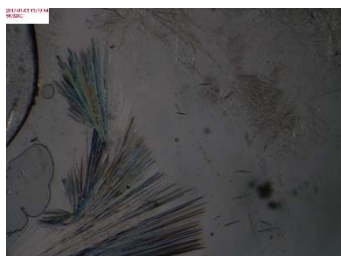

56.9°

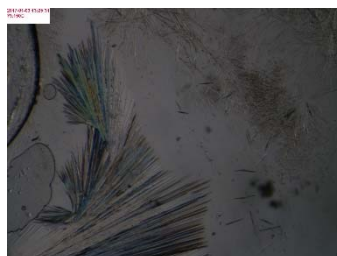

79.2°

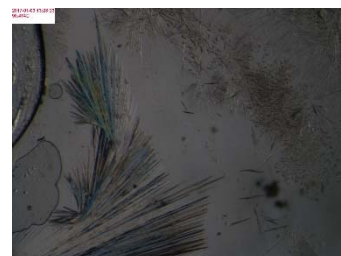

90.5°

## Methyl

(*S*)-NO<sub>2</sub>  
(*R*)-Me

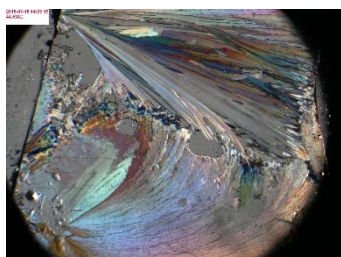

44.5°

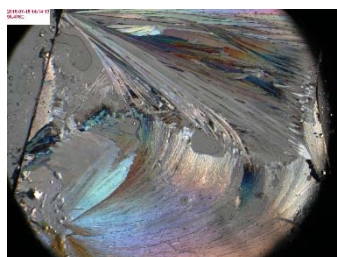

98.5°

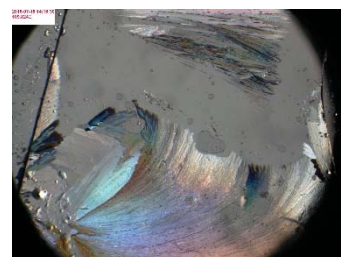

109.8°

(*S*)-Br  
(*R*)-Me

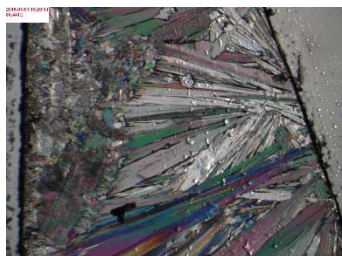

81.4°

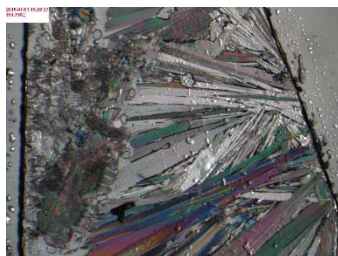

101.8°

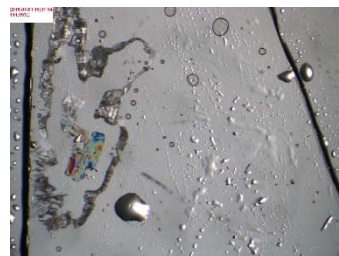

112.0°

(*S*)-Me  
(*R*)-CF<sub>3</sub>

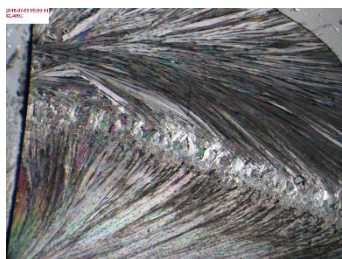

82.4°

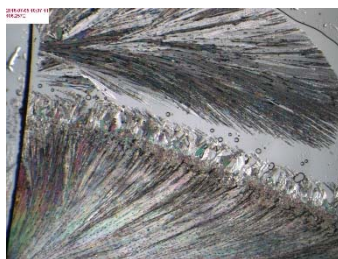

106.3°

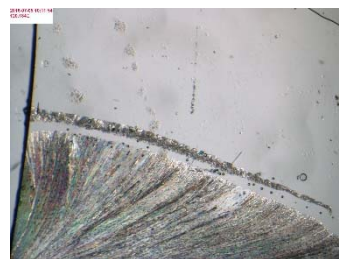

120.2°

(*S*)-OMe  
(*R*)-Me

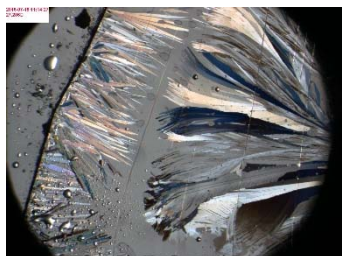

27.3°

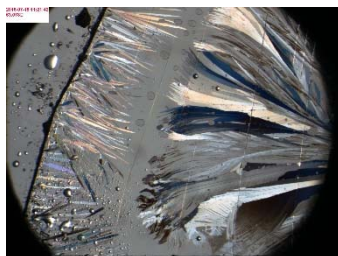

63.1°

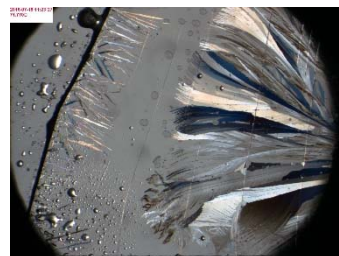

71.8°

(*S*)-I  
(*R*)-Me

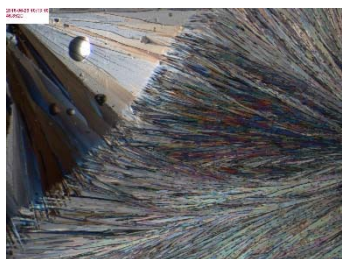

46.9°

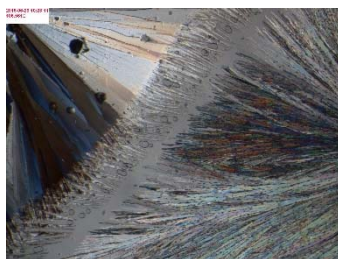

106.6°

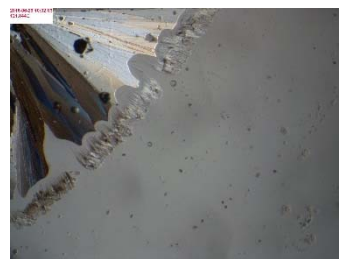

121.8°

(*S*)-Me  
(*R*)-Phenyl

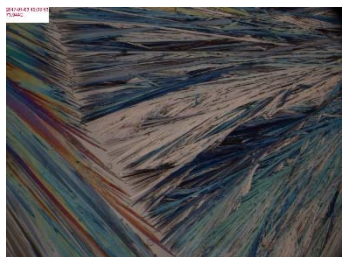

73.9°

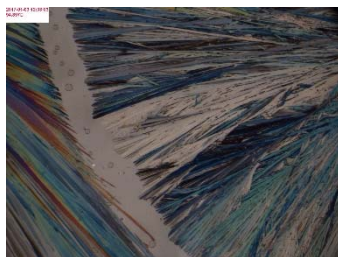

94.9°

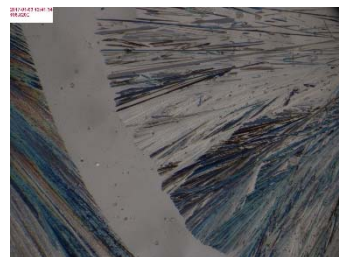

108.8°

## Nitro

(*R*)-NO<sub>2</sub>  
(*S*)-Br

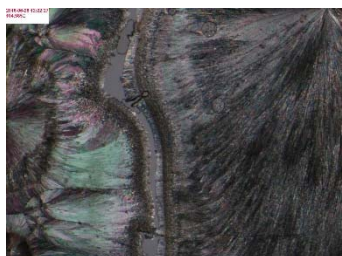

105.0°

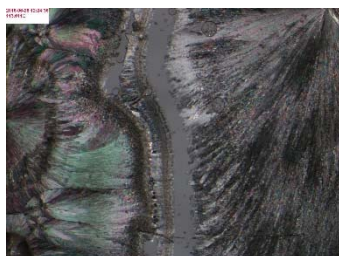

113.6°

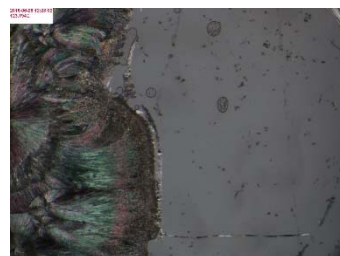

123.8°

(*S*)-NO<sub>2</sub>  
(*R*)-CF<sub>3</sub>

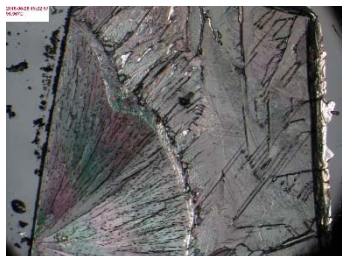

92.0°

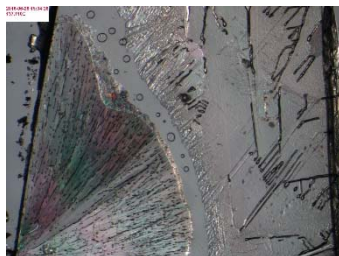

137.7°

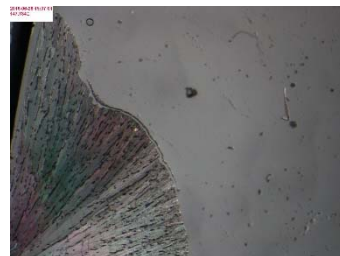

147.8°

(*R*)-NO<sub>2</sub>  
(*S*)-OMe

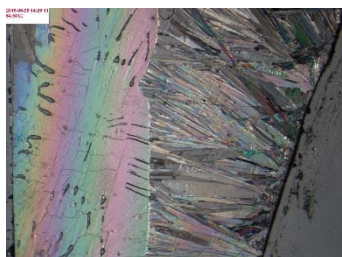

64.6°

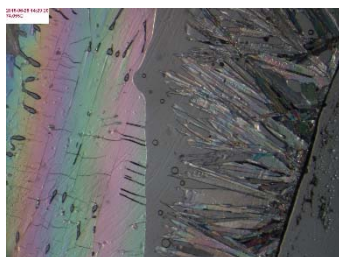

74.1°

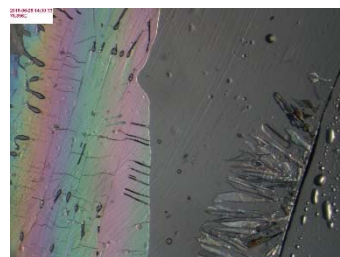

78.9°

(*R*)-NO<sub>2</sub>  
(*S*)-I

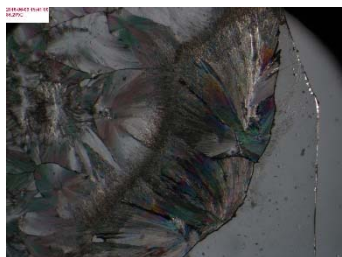

81.3°

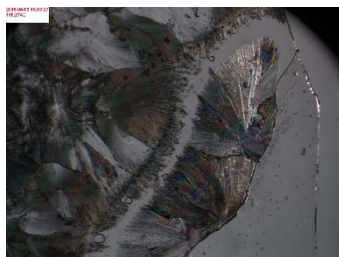

118.3°

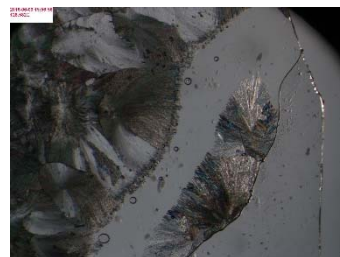

128.6°

(*S*)-NO<sub>2</sub>  
(*R*)-Phenyl

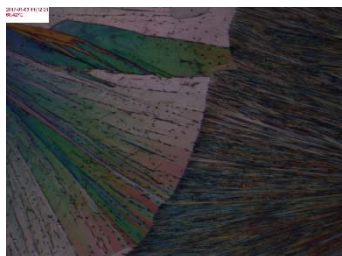

60.4°

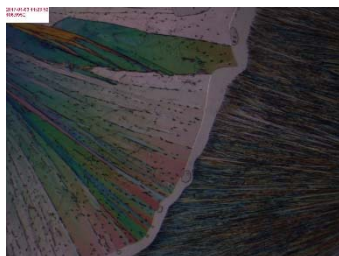

107.0°

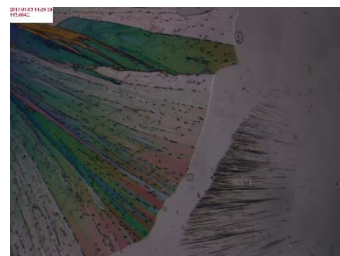

113.1°

## Bromide

(*S*)-Br  
(*R*)-CF<sub>3</sub>

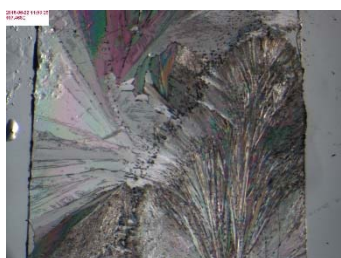

107.5°

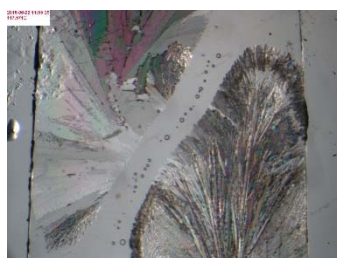

117.6°

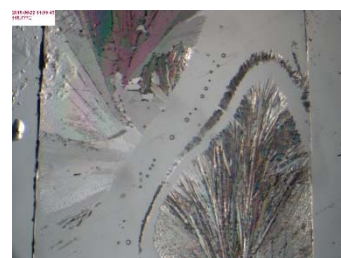

118.8°

(*S*)-OMe  
(*R*)-Br

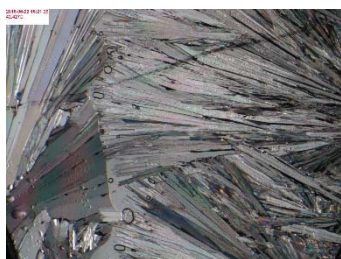

42.4°

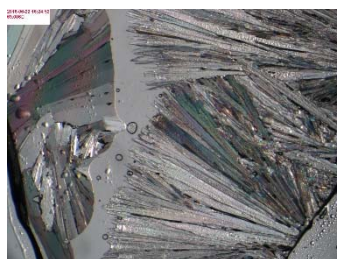

69.1°

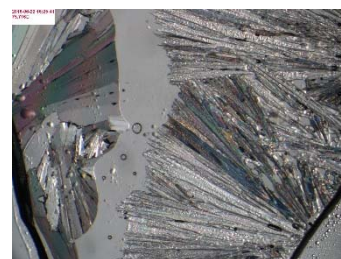

75.7°

(*S*)-I  
(*R*)-Br

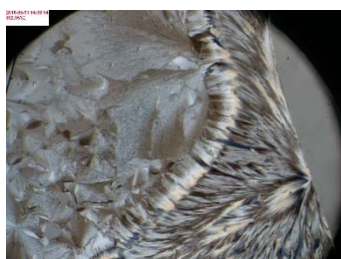

103.0°

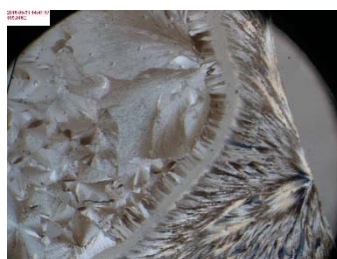

109.8°

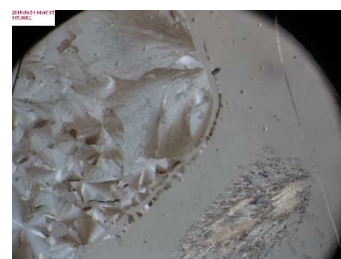

112.0°

(*S*)-Br  
(*R*)-Phenyl

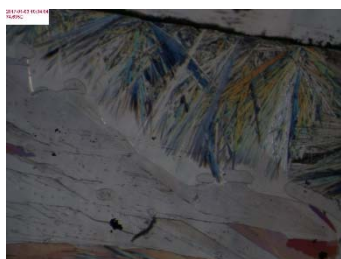

74.6°

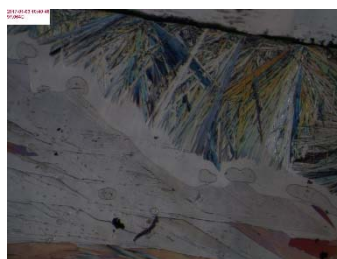

97.1°

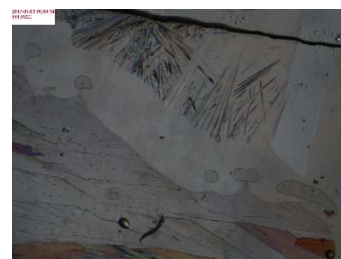

111.9°

## Trifluoromethyl

(*S*)-OMe  
(*R*)-CF<sub>3</sub>

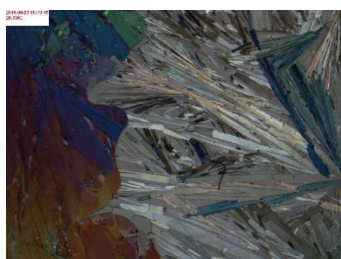

26.3°

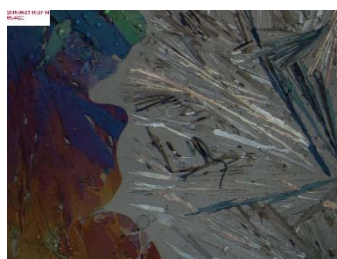

65.4°

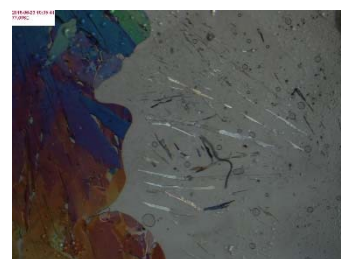

77.1°

(S)-I  
(R)-CF<sub>3</sub>

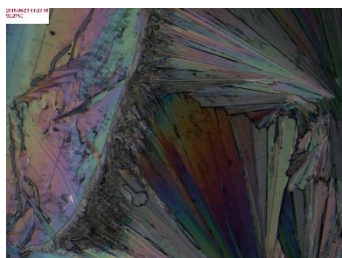

92.3°

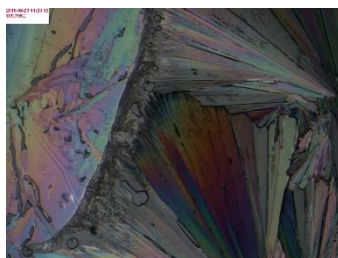

109.8°

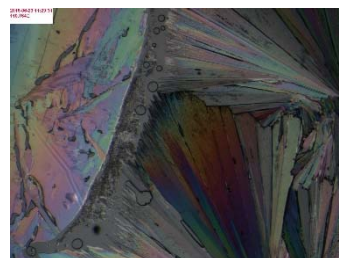

110.8°

(S)-Phenyl  
(R)-CF<sub>3</sub>

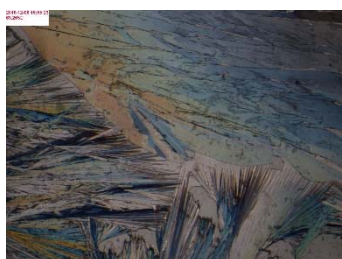

69.3°

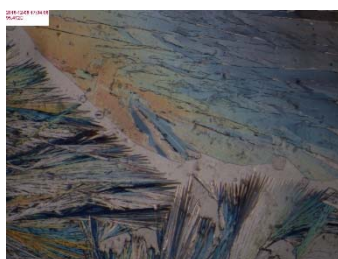

95.4°

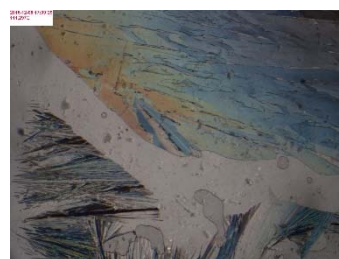

111.3°

### Methoxy

(S)-OMe  
(R)-I

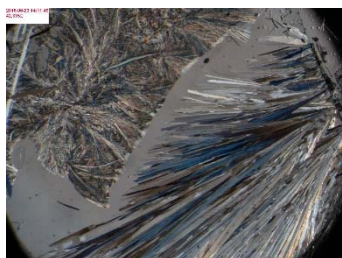

42.3°

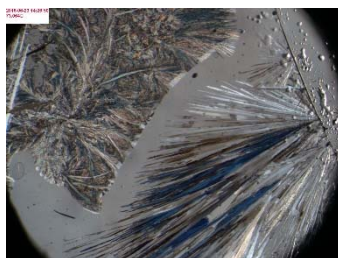

73.1°

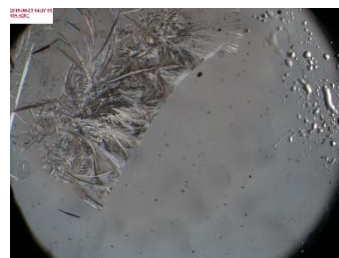

105.5°

(R)-Phenyl  
(S)-OMe

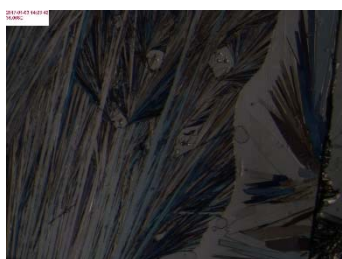

31.0°

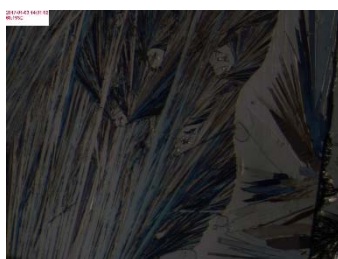

60.2°

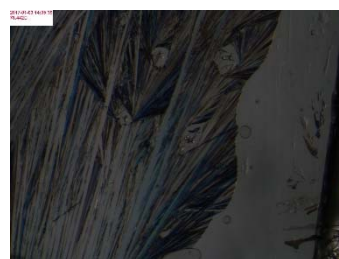

78.4°

### Iodide

(R)-I  
(S)-Phenyl

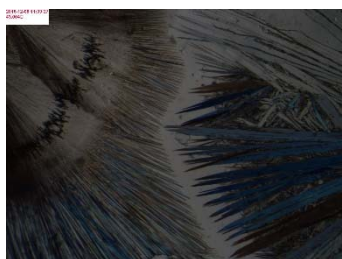

43.0°

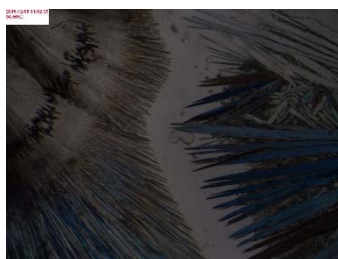

94.6°

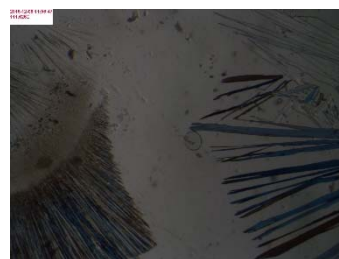

111.6°

## Hot Stage Images of Same Handed Homochiral Diarylamide Derivatives

### Hydrogen

(R)-H (left)

(R)-F (right)

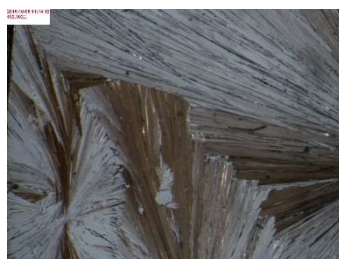

102.3°

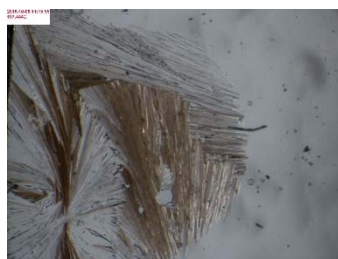

107.4°

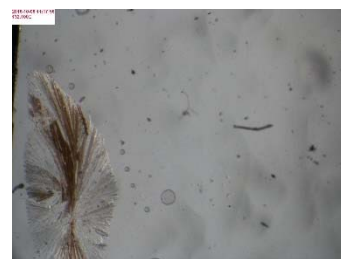

132.1°

(S)-Cl

(S)-H

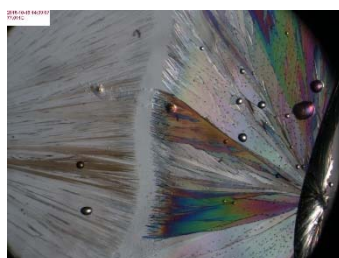

77.0°

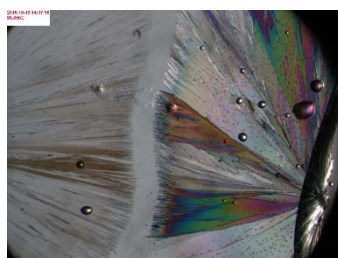

88.9°

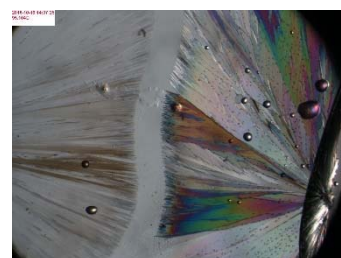

95.1°

(R)-H

(R)-CN

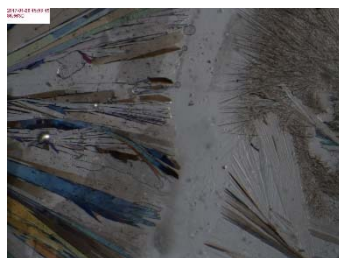

86.6°

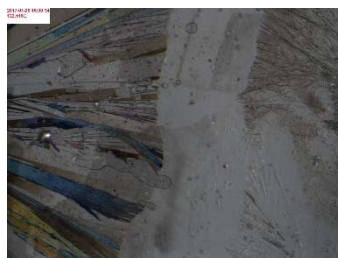

122.5°

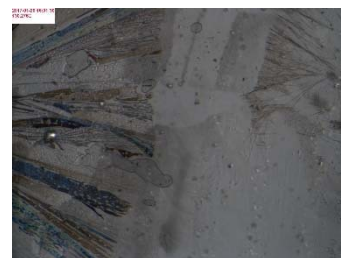

130.3°

(S)-H

(S)-Me

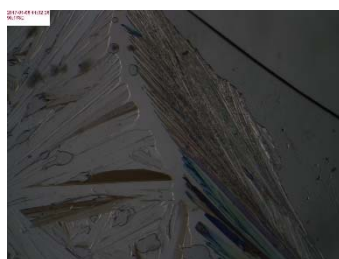

90.2°

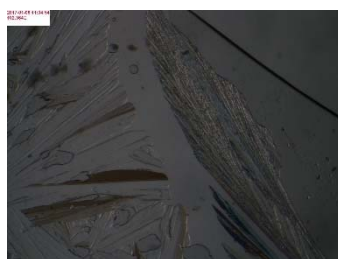

102.4°

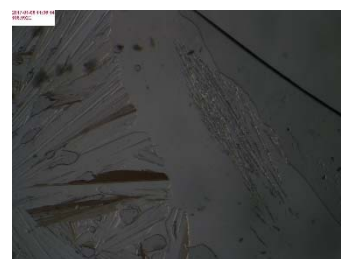

109.0°

(S)-NO<sub>2</sub>

(S)-H

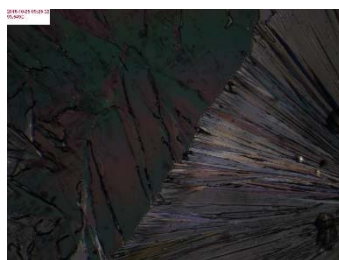

93.5°

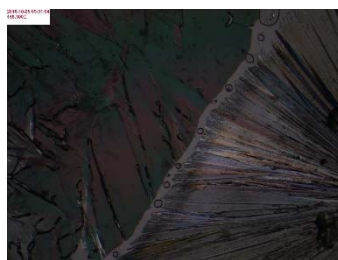

118.3°

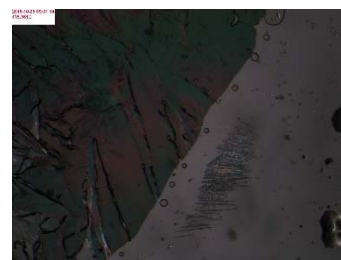

135.4°

(S)-H  
(S)-Br

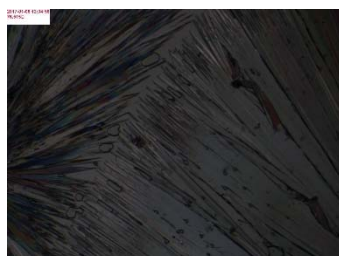

76.5°

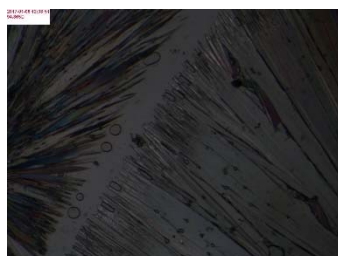

94.9°

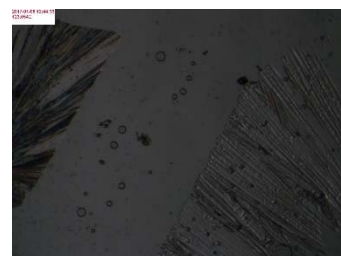

123.1°

(S)-H  
(S)-CF<sub>3</sub>

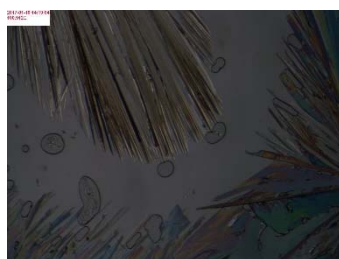

100.9°

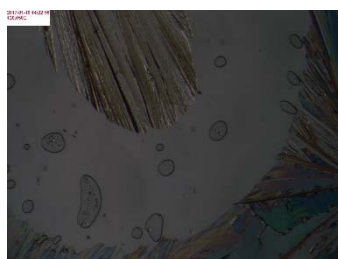

120.1°

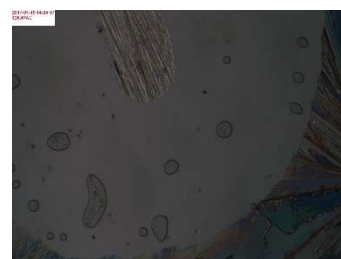

126.7°

(S)-OMe  
(S)-H

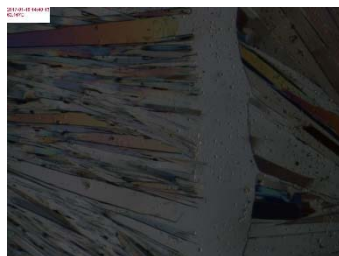

62.2°

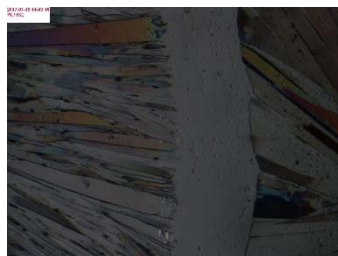

78.2°

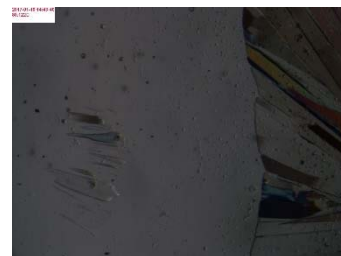

80.1°

(S)-I  
(S)-H

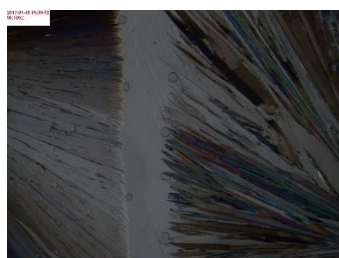

90.1°

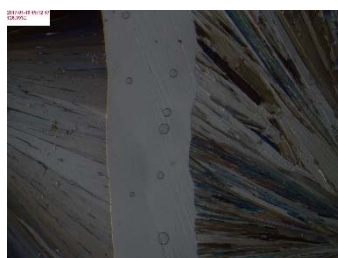

126.4°

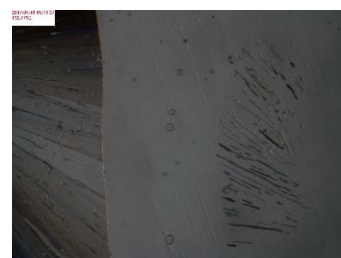

132.2°

(R)-Phenyl  
(R)-H

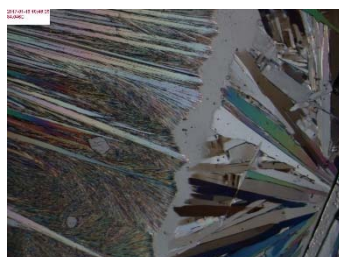

84.0°

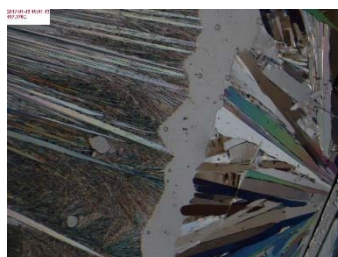

107.4°

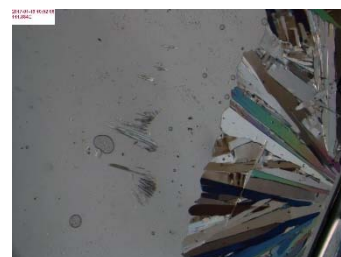

111.9°

# Fluoride

(S)-Cl  
(S)-F

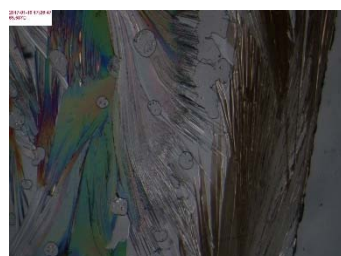

65.6°

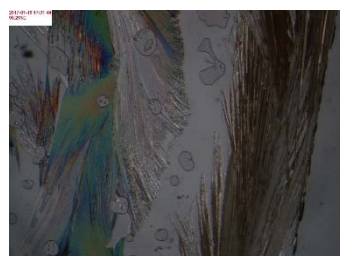

90.3°

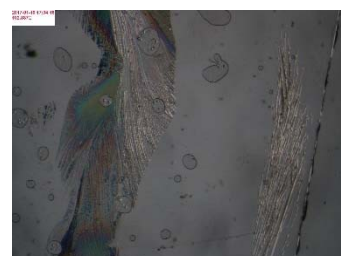

102.9°

(R)-F  
(R)-CN

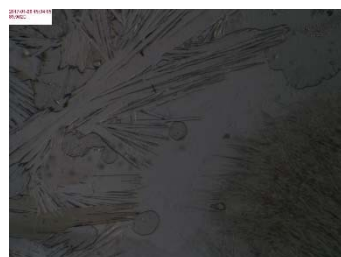

89.9°

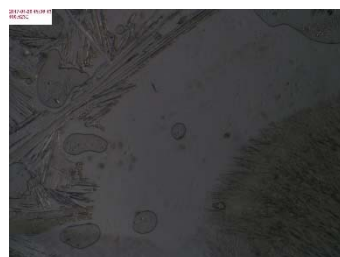

100.5°

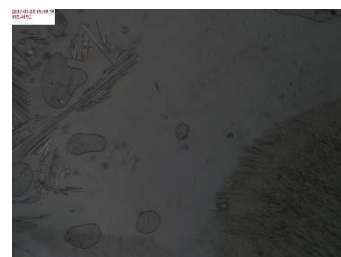

102.4°

(S)-Me  
(S)-F

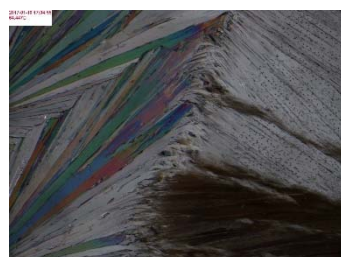

64.4°

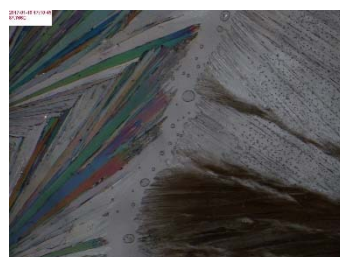

87.8°

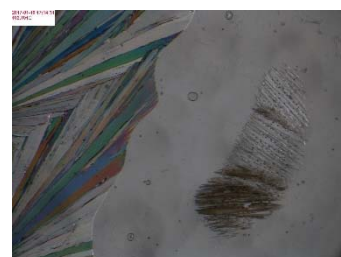

102.7°

(S)-F  
(S)-NO<sub>2</sub>

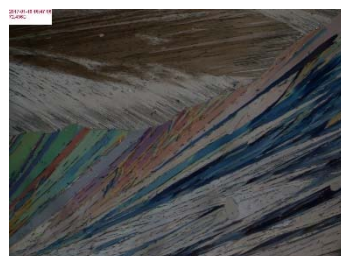

72.4°

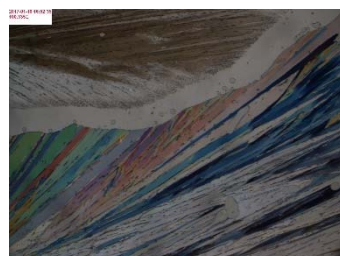

100.3°

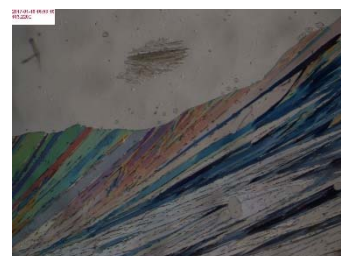

103.2°

(S)-Br  
(S)-F

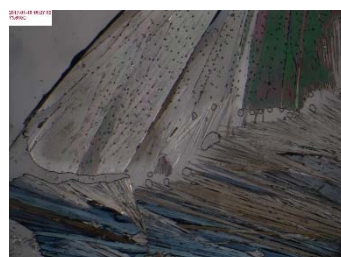

73.6°

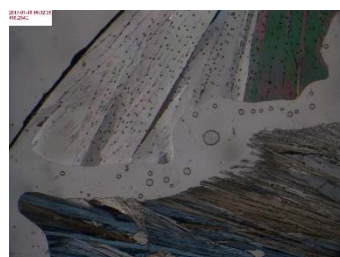

100.2°

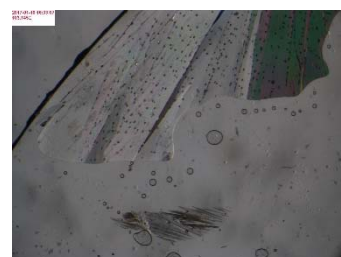

103.7°

(S)-F  
(S)-CF<sub>3</sub>

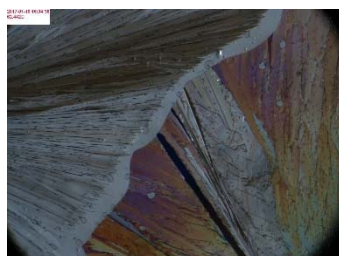

62.4°

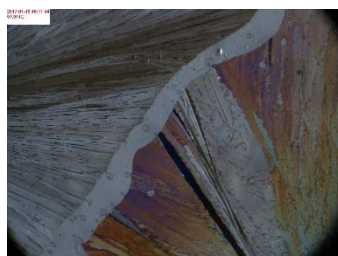

97.9°

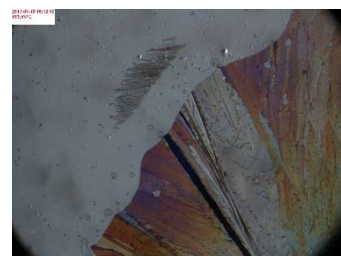

103.5°

(S)-F  
(S)-OMe

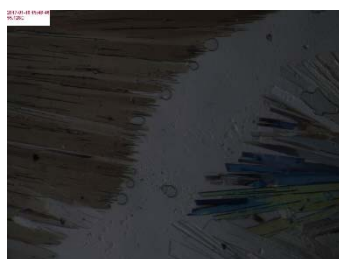

55.1°

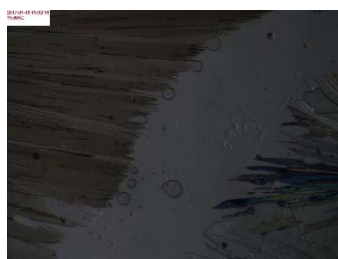

75.6°

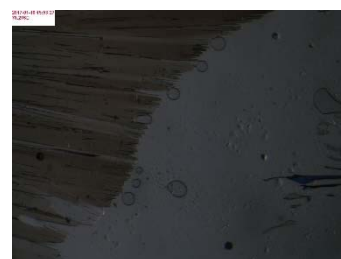

78.3°

(S)-F  
(S)-I

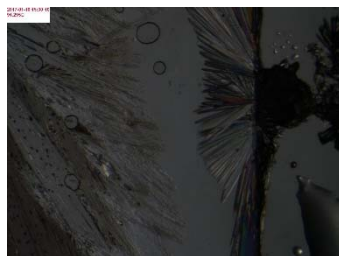

91.3°

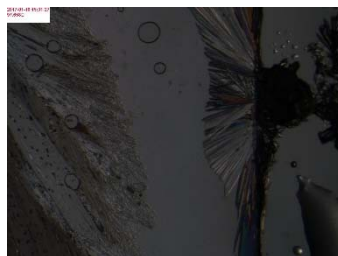

97.7°

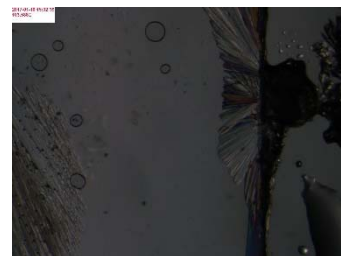

103.6°

(R)-Phenyl  
(R)-F

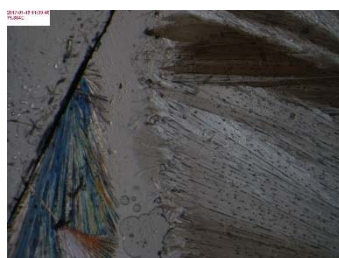

75.9°

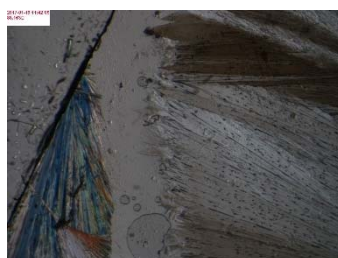

88.2°

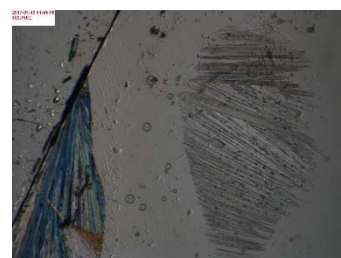

102.8°

**Chloride**

(R)-Cl  
(R)-CN

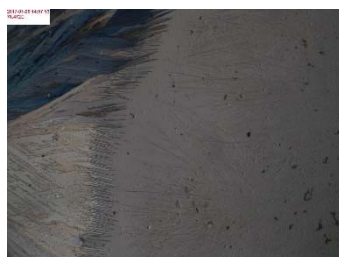

78.5°

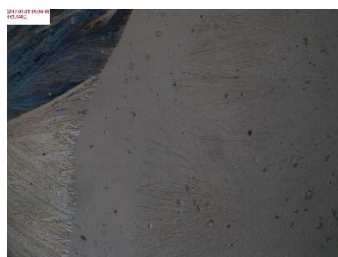

113.7°

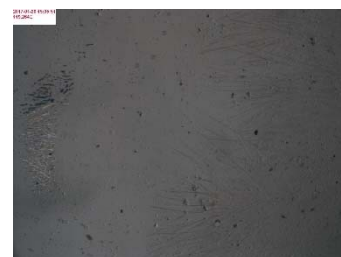

119.3°

(S)-Cl  
(S)-Me

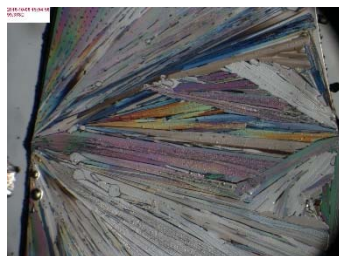

99.4°

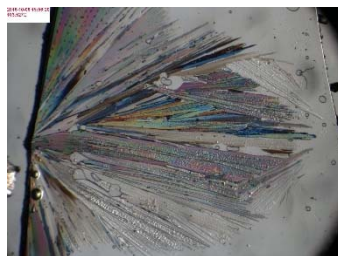

103.5°

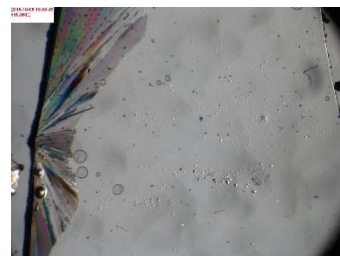

110.9°

(S)-NO<sub>2</sub>  
(S)-Cl

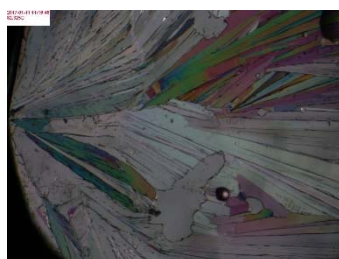

82.2°

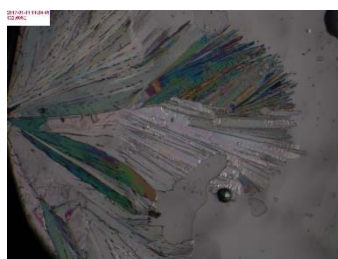

122.6°

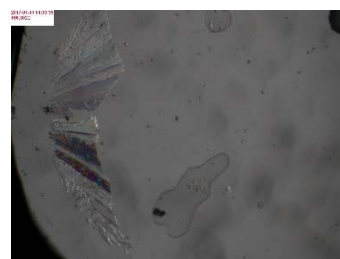

166.3°

(R)-Cl  
(R)-Br

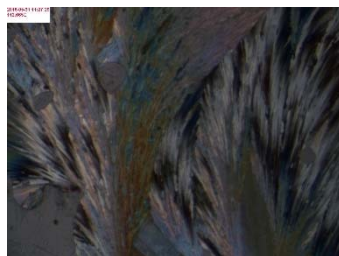

112.7°

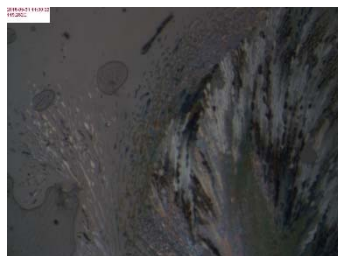

119.3°

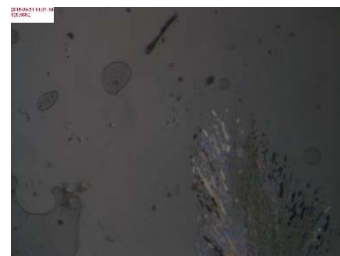

121.0°

(S)-CF<sub>3</sub>  
(S)-Cl

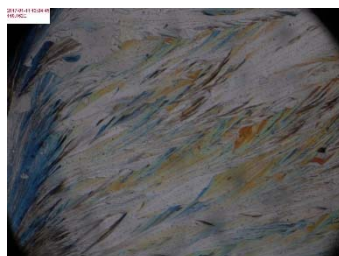

110.2°

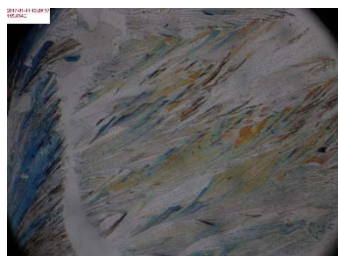

119.8°

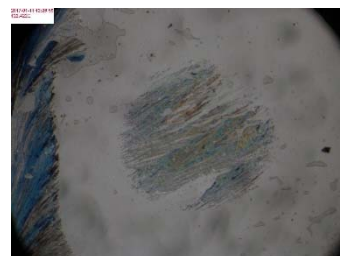

122.4°

(S)-OMe  
(S)-Cl

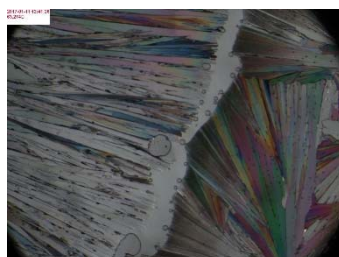

63.3°

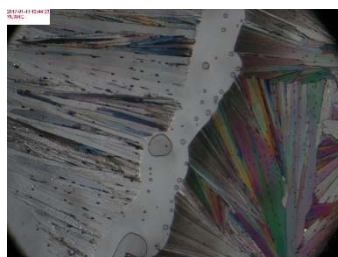

78.4°

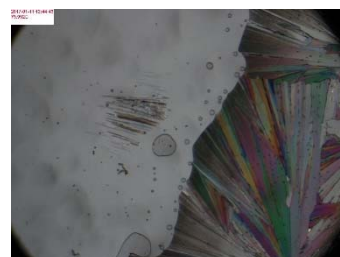

78.0°

(*R*)-I  
(*R*)-Cl

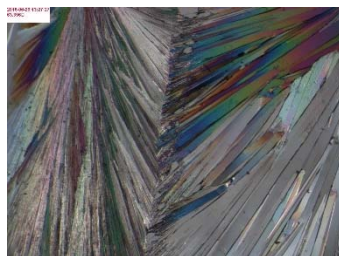

63.4°

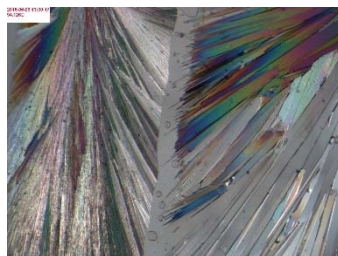

94.1°

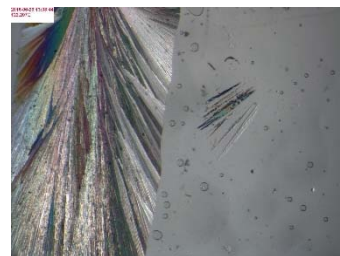

122.2°

(*R*)-Phenyl  
(*R*)-Cl

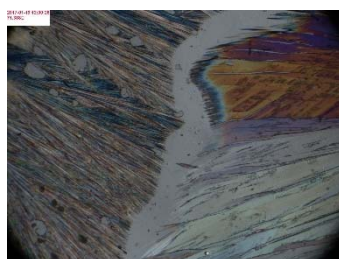

71.4°

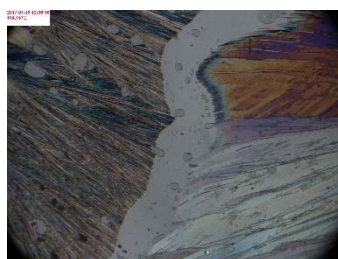

104.2°

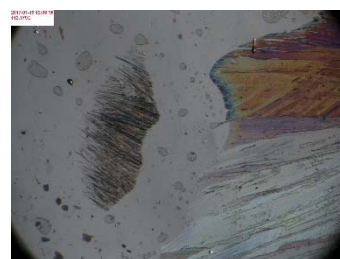

112.4°

**Cyano**

(*R*)-Me  
(*R*)-CN

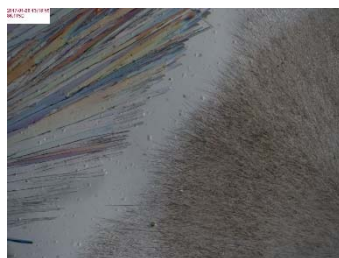

86.2°

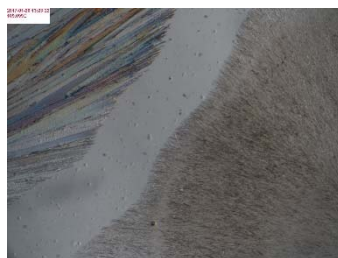

109.1°

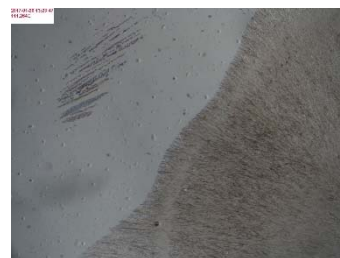

111.3°

(*R*)-NO<sub>2</sub>  
(*R*)-CN

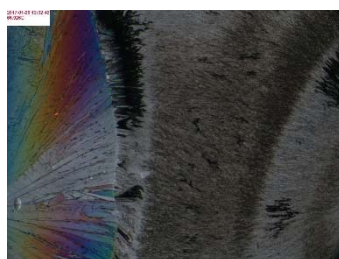

66.9°

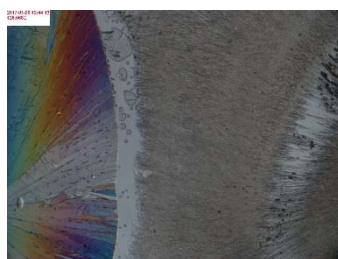

126.1°

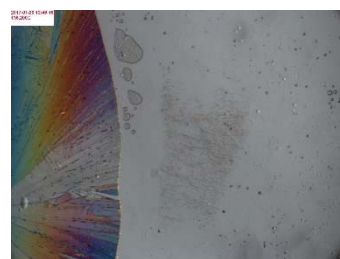

136.2°

(*R*)-Br  
(*R*)-CN

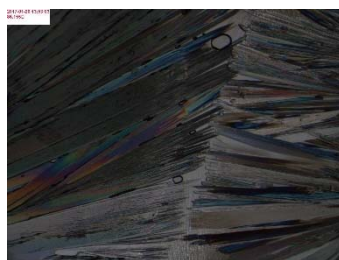

86.2°

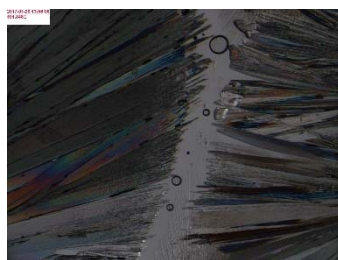

101.8°

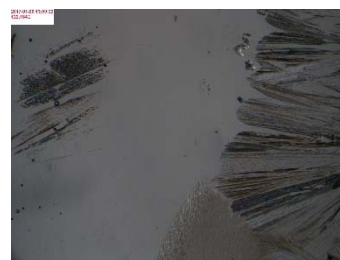

122.2°

(*R*)-CF<sub>3</sub>  
(*R*)-CN

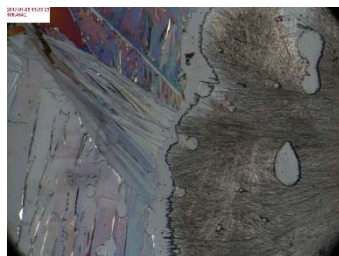

106.5°

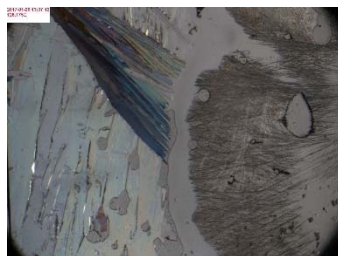

126.2°

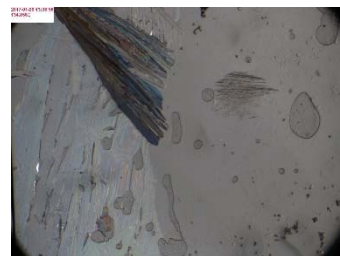

134.9°

(*R*)-OMe  
(*R*)-CN

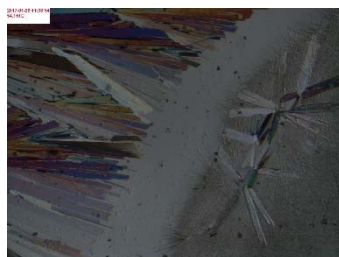

54.2°

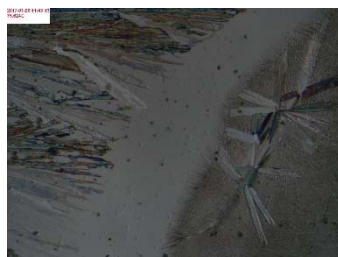

75.6°

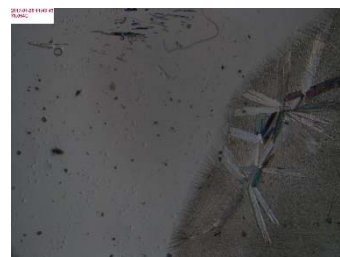

78.1°

(*R*)-CN  
(*R*)-I

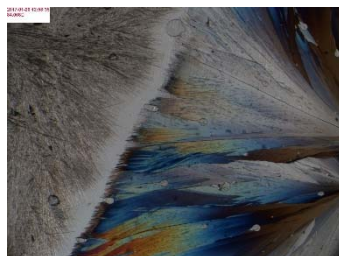

84.0°

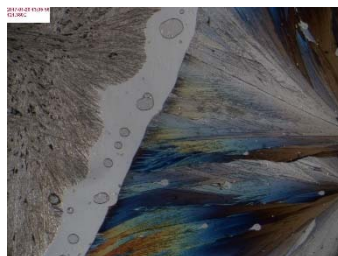

121.4°

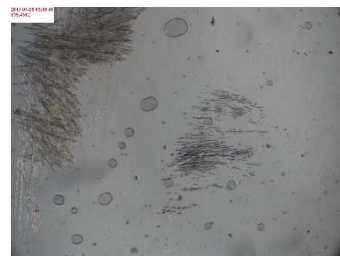

135.4°

(*R*)-Phenyl  
(*R*)-CN

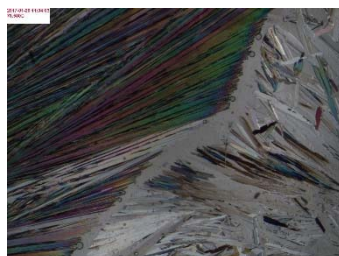

78.6°

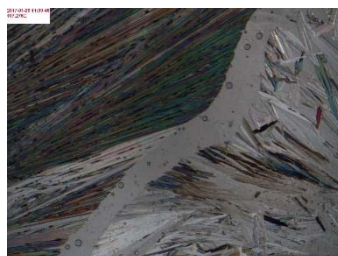

107.3°

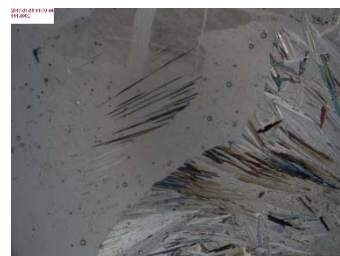

111.8°

### Methyl

(*S*)-NO<sub>2</sub>  
(*S*)-Me

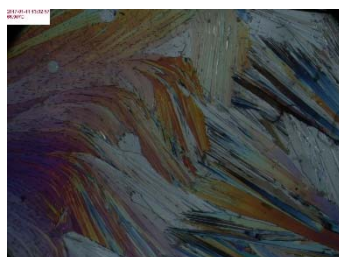

66.9°

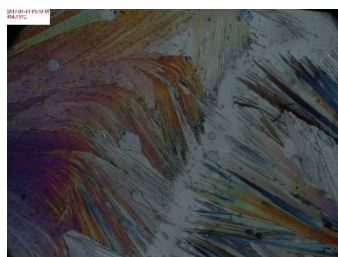

104.1°

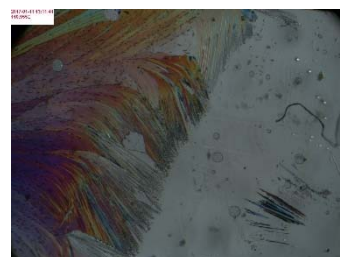

111.0°

(*S*)-Br  
(*S*)-Me

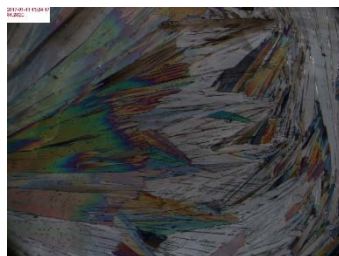

81.3°

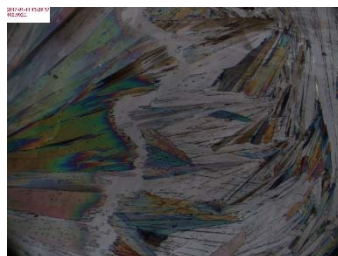

103.0°

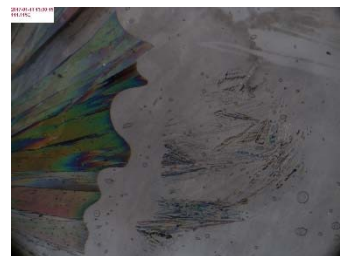

111.1°

(*R*)-CF<sub>3</sub>  
(*R*)-Me

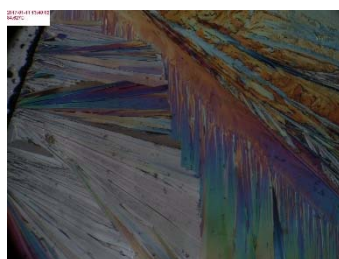

84.6°

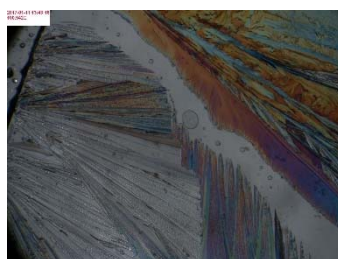

100.9°

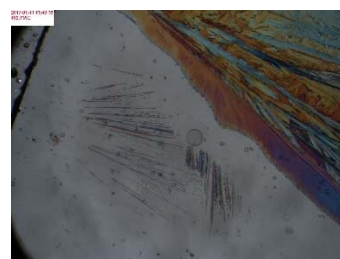

102.7°

(*S*)-OMe  
(*S*)-Methyl

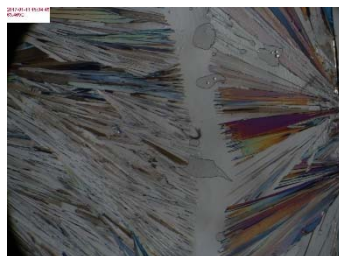

63.5°

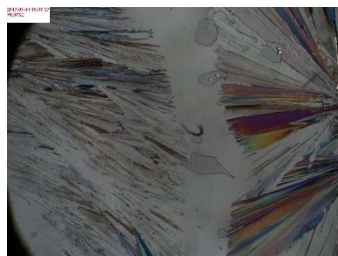

77.0°

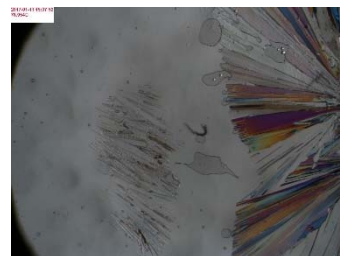

79.0°

(*R*)-I  
(*R*)-Me

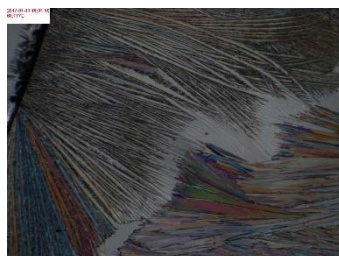

60.2°

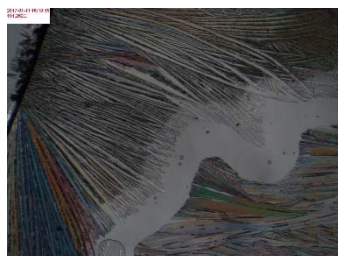

101.3°

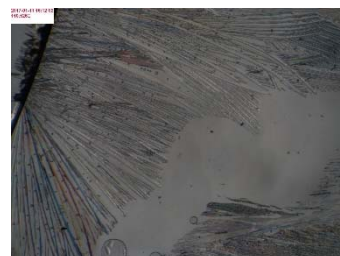

110.5°

(*R*)-Phenyl  
(*R*)-Me

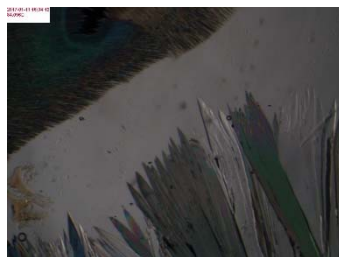

84.1°

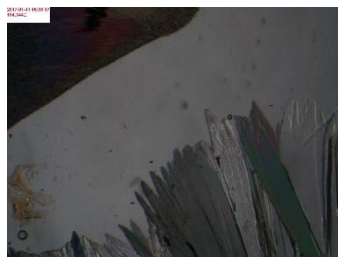

104.3°

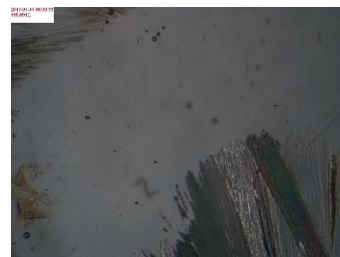

110.7°

## Nitro

(*S*)-NO<sub>2</sub>  
(*S*)-Br

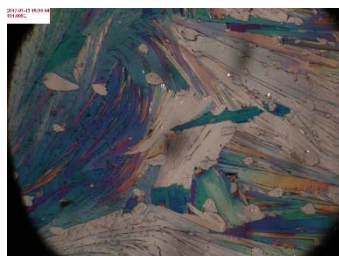

101.0°

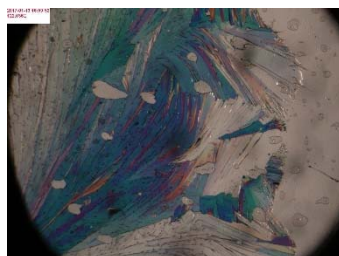

122.0°

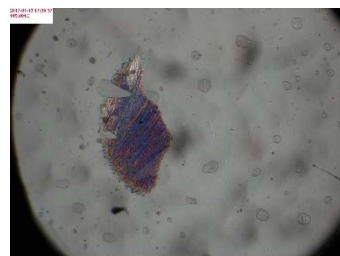

169.0°

(*S*)-NO<sub>2</sub>  
(*S*)-CF<sub>3</sub>

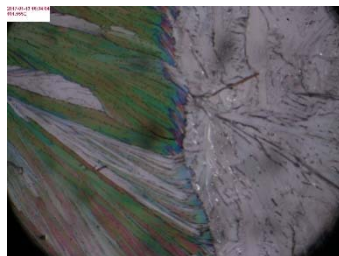

101.6°

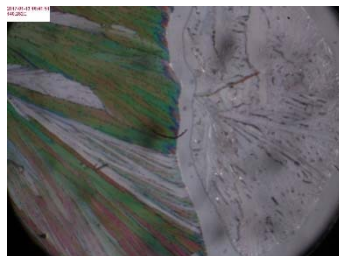

140.3°

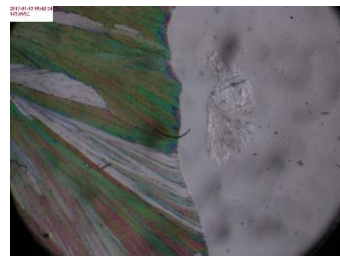

143.1°

(*S*)-NO<sub>2</sub>  
(*S*)-OMe

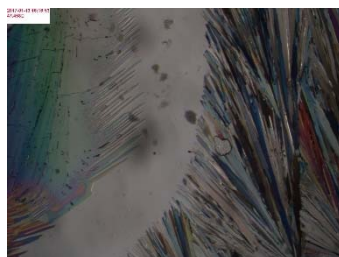

47.5°

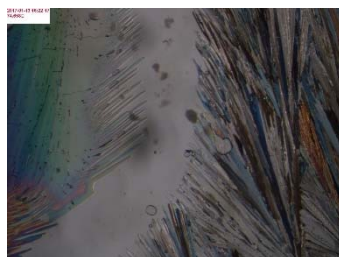

74.7°

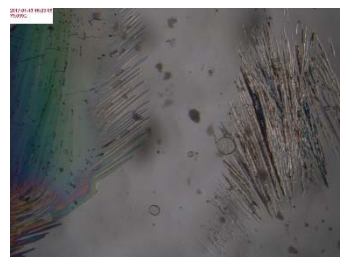

79.0°

(*S*)-NO<sub>2</sub>  
(*S*)-I

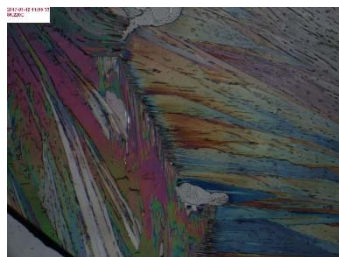

86.2°

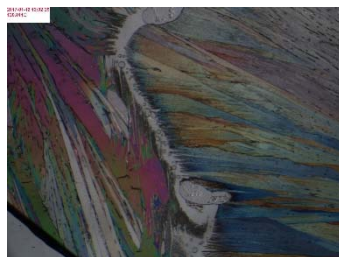

120.8°

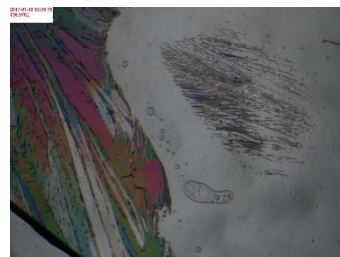

137.0°

(*R*)-NO<sub>2</sub>  
(*R*)-Phenyl

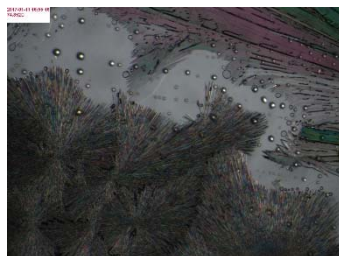

74.9°

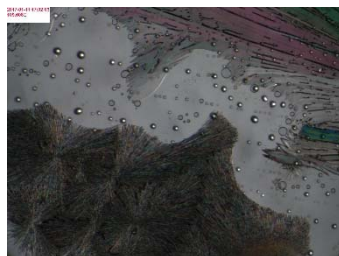

109.7°

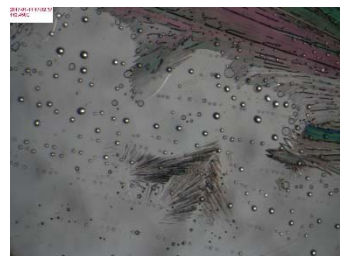

112.5°

## Bromide

(*R*)-CF<sub>3</sub>  
(*R*)-Br

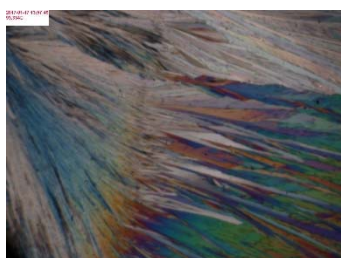

93.3°

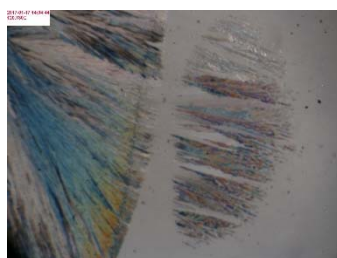

120.8°

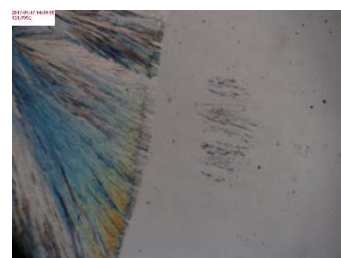

121.8°

(*S*)-OMe  
(*S*)-Br

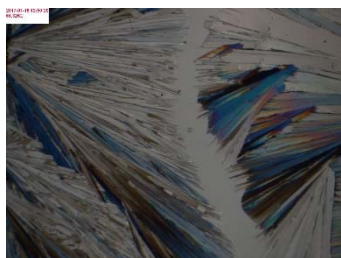

61.3°

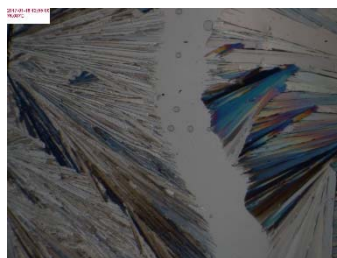

76.1°

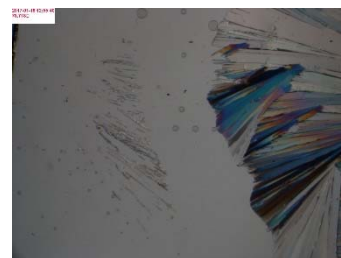

78.7°

(*S*)-I  
(*S*)-Br

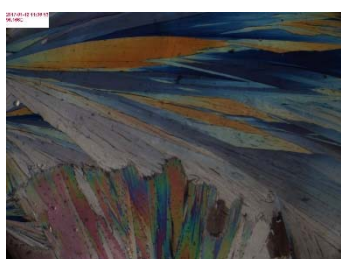

96.2°

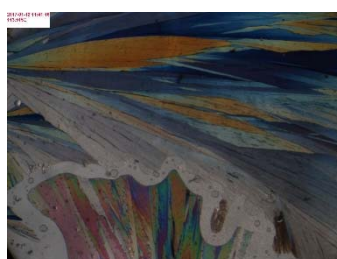

113.5°

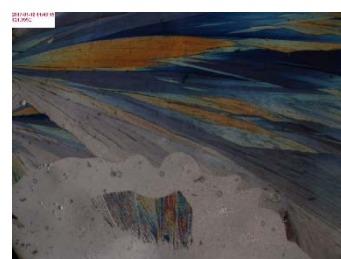

121.4°

(*S*)-Br  
(*S*)-Phenyl

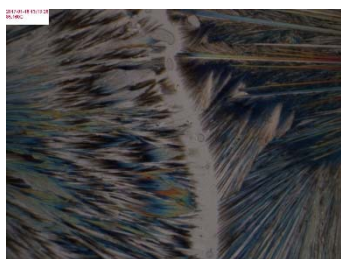

85.2°

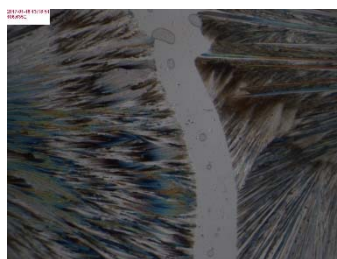

106.6°

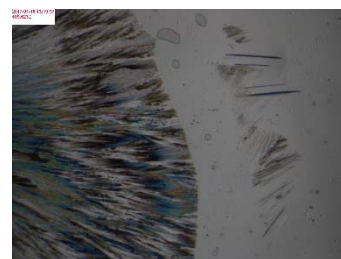

109.6°

## Trifluoromethyl

(*S*)-CF<sub>3</sub>  
(*S*)-OMe

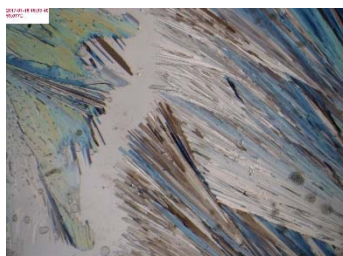

59.1°

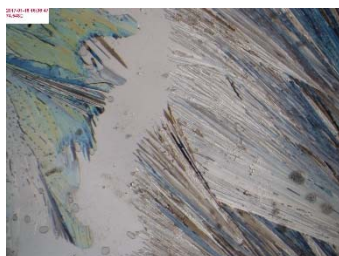

74.5°

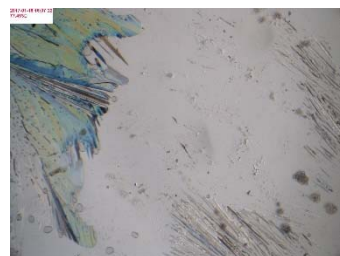

77.5°

(*S*)-I  
(*S*)-CF<sub>3</sub>

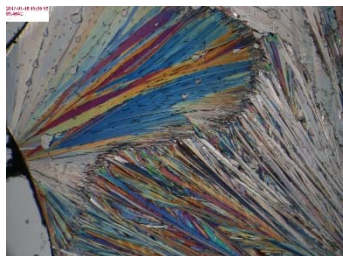

89.5°

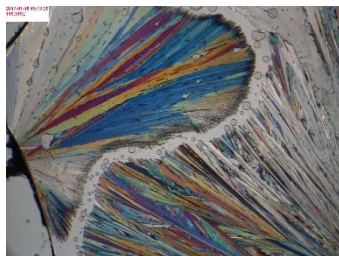

119.3°

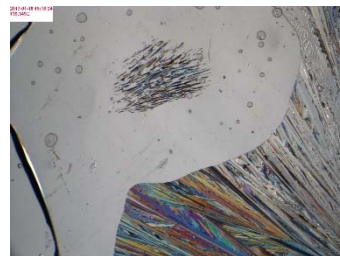

139.3°

(*R*)-CF<sub>3</sub>  
(*R*)-Phenyl

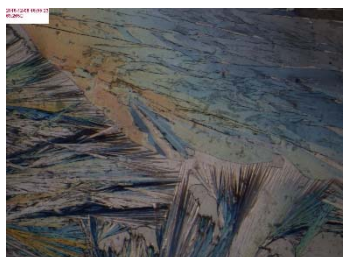

69.3°

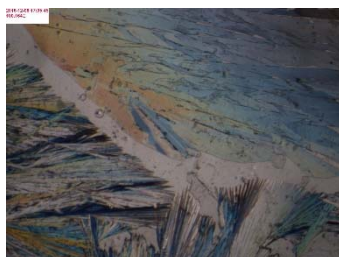

100.2°

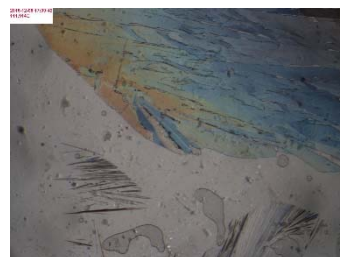

111.9°

## Methoxy

(*S*)-I  
(*S*)-OMe

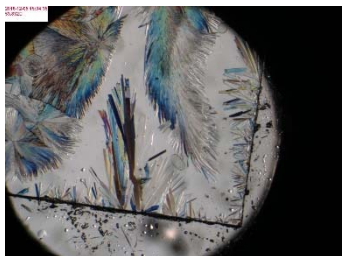

53.8°

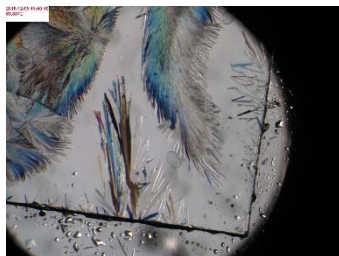

69.9°

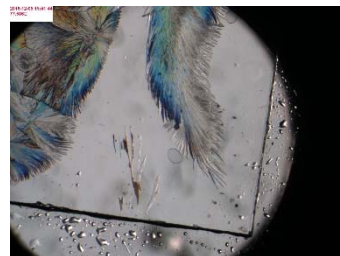

77.6°

(*R*)-OMe  
(*R*)-Phenyl

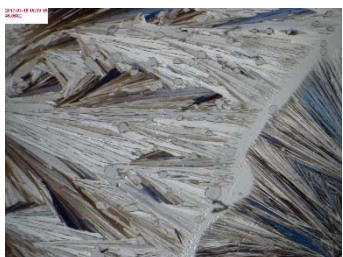

46.1°

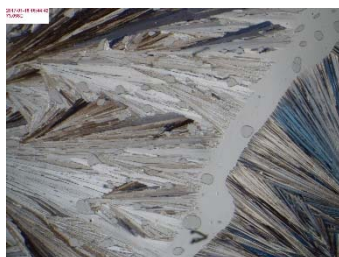

73.1°

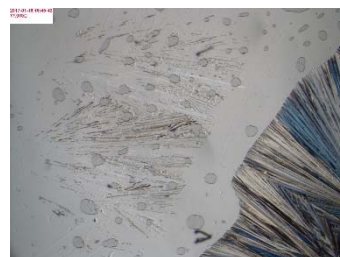

78.0°

## Iodide

(*R*)-Phenyl  
(*R*)-I

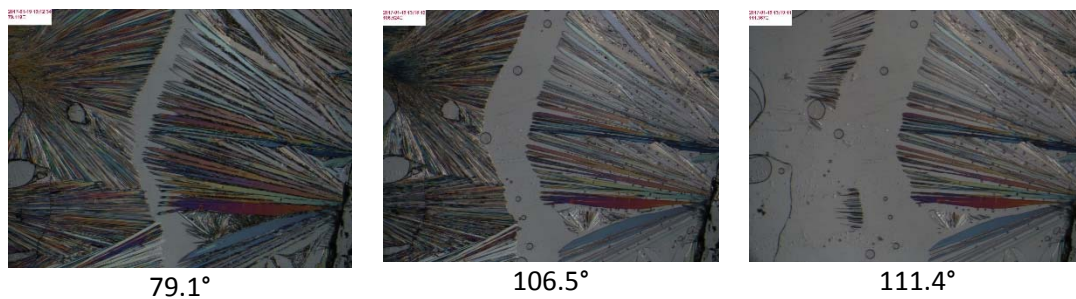

### S3. X-ray Crystallography - Powder Diffraction

Powder X-ray diffraction data were collected on a Bruker APEX II CCD diffractometer using phi and omega scans with graphite monochromatic Cu Mo  $K\alpha$  ( $\lambda = 1.54178 \text{ \AA}$ ) radiation. Data sets were collected at a detector distance of 15 cm using 4 Phi scans with  $10^\circ$  increments in  $2\theta$  ( $-20^\circ \rightarrow -50^\circ$ ) and omega ( $170^\circ \rightarrow 140^\circ$ ). The images were integrated using the APEX II XRD<sup>2</sup> plugin.

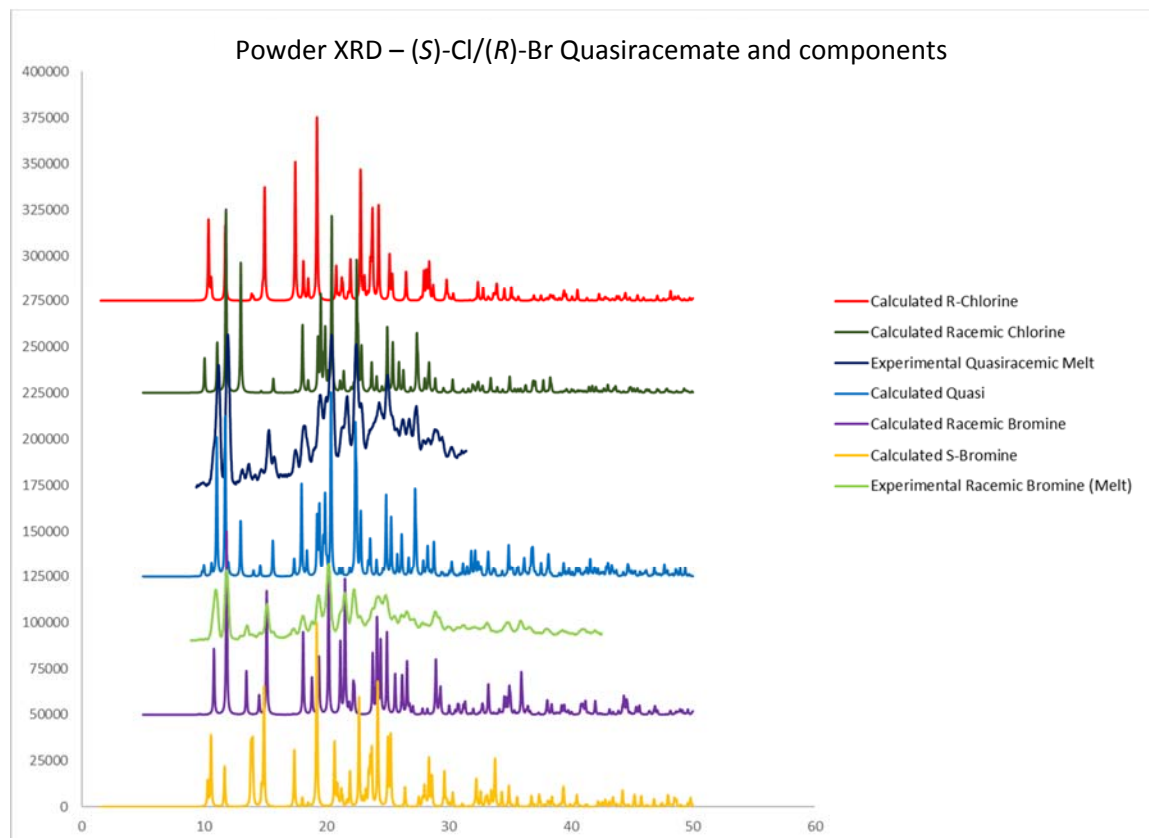

Powder XRD - (S)-Methyl/ (R)- Trifluoromethyl Quasiracemate  
and Components

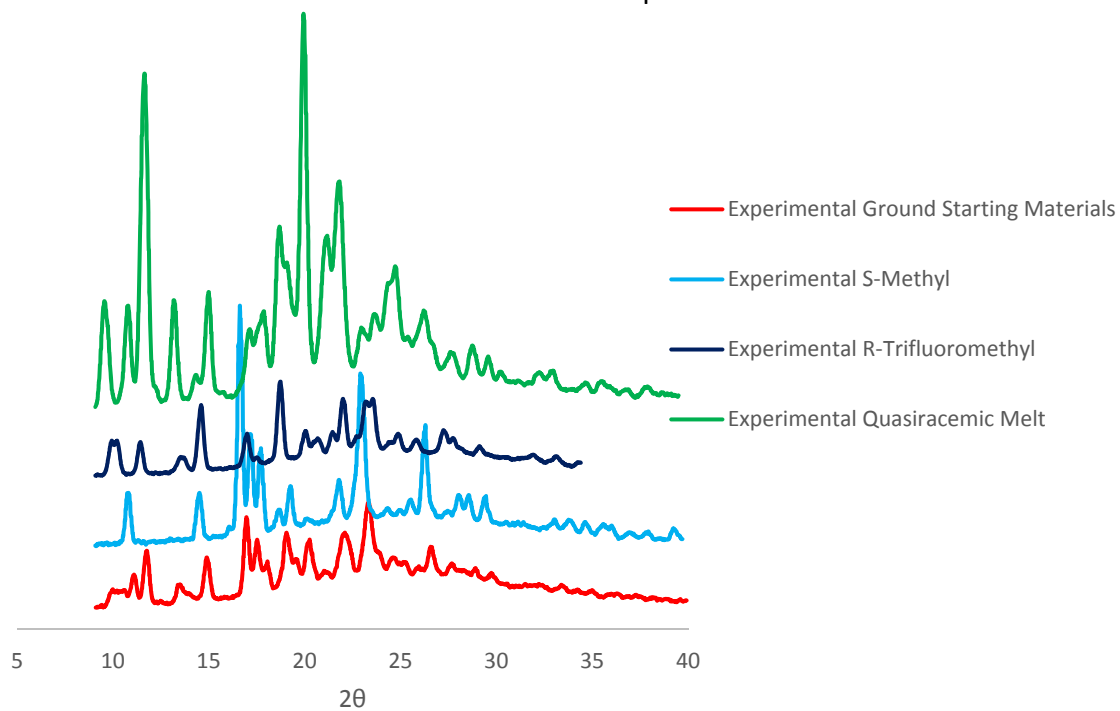

Powder XRD - (*S*)-Bromide/(*R*)-Trifluoromethyl  
and Components

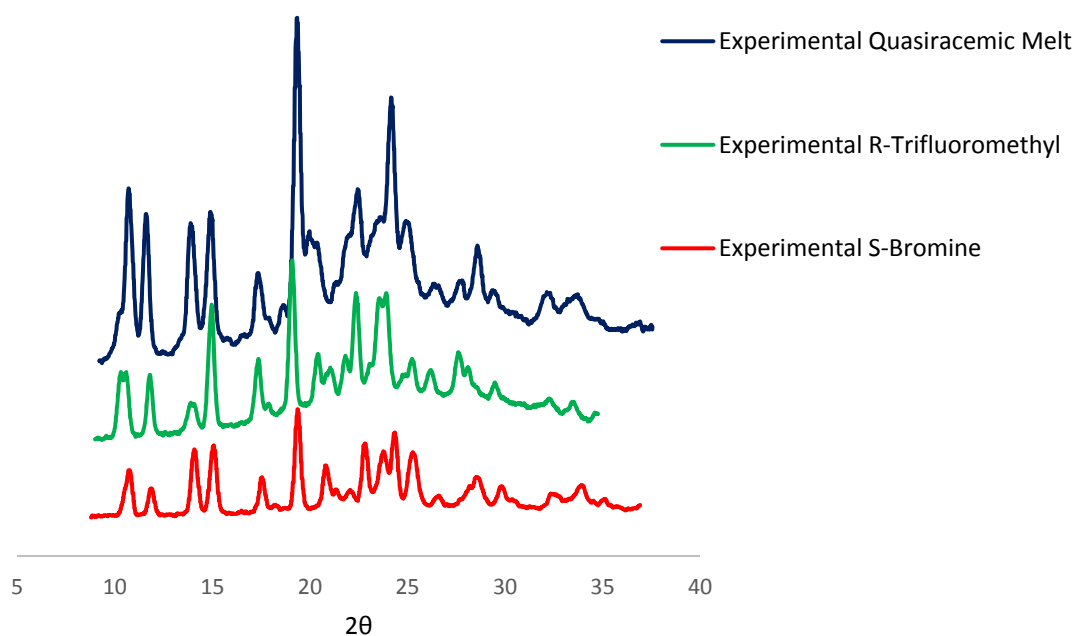

Powder X-Ray Diffraction of Quasiracemic S-Chloride/  
*R*-Nitro and Starting Components

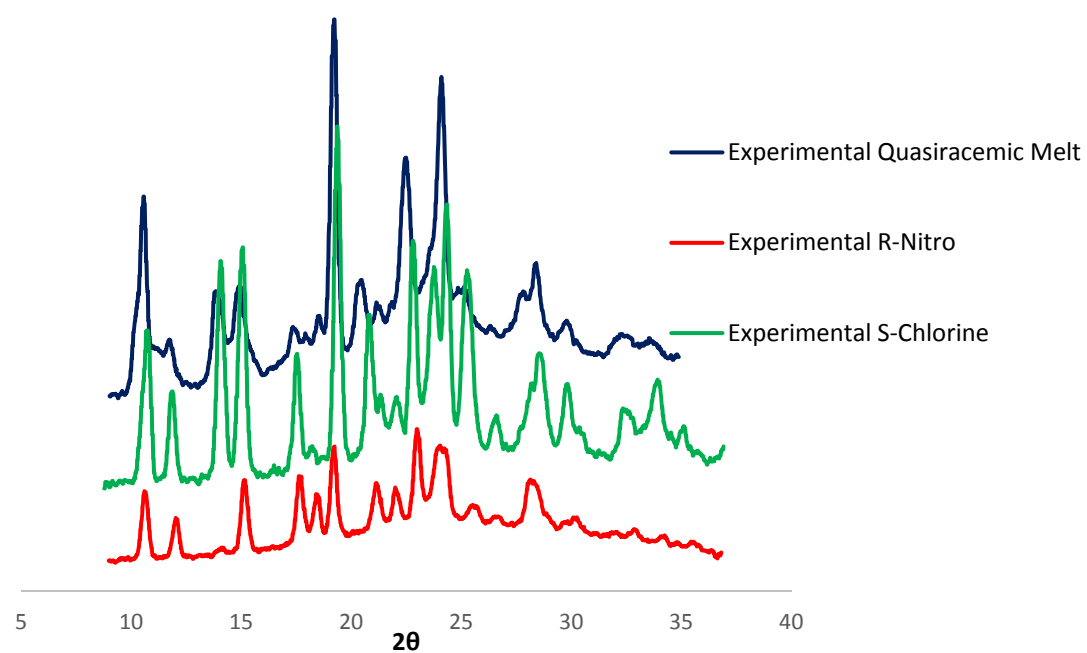

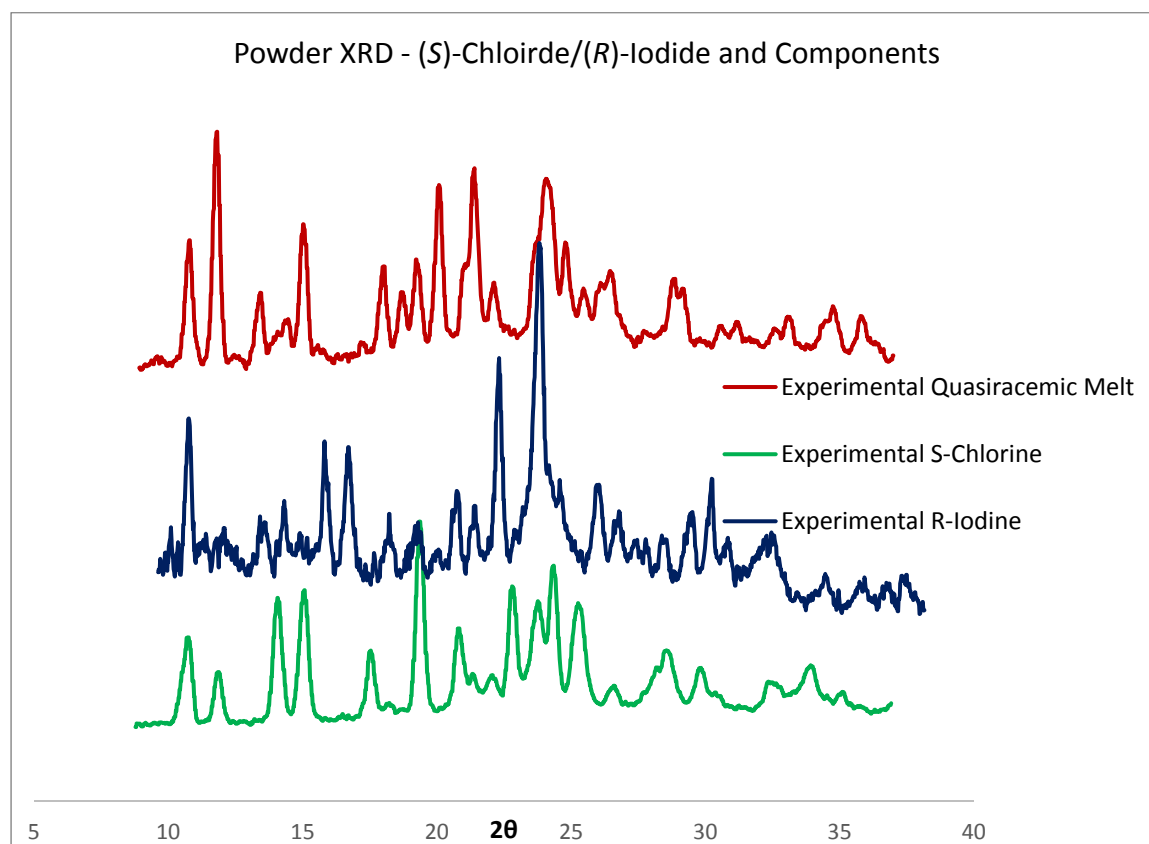

#### S4. X-ray Crystallography – Single Crystal Diffraction

Crystallographic details for each diarylamide quasiracemate are summarized in Table S1. X-ray data were collected on a Bruker APEX II CCD diffractometer using phi and omega scans with graphite monochromatic Cu Mo  $K\alpha$  ( $\lambda = 1.54178 \text{ \AA}$ ) radiation. Data sets were corrected for Lorentz and polarization effects as well as absorption. The criterion for observed reflections is  $I > 2\sigma(I)$ . Lattice parameters were determined from least-squares analysis and reflection data. Empirical absorption corrections were applied using SADABS.<sup>2</sup> Structures were solved by direct methods and refined by full-matrix least-squares analysis on  $F^2$  using X-SEED<sup>3</sup> equipped with SHELXS<sup>4</sup>. All non-hydrogen atoms were refined anisotropically by full-matrix least-squares on  $F^2$  using the SHELXL<sup>4</sup> program. H atoms (for OH and NH) were located in difference Fourier synthesis and refined isotropically with independent O/N-H distances or restrained to 0.85(2)  $\text{\AA}$ .

2. G. M. Sheldrick, SADABS and TWINABS—Program for Area Detector Absorption Corrections, University of Göttingen, Göttingen, Germany, 2010.

3. L. J. Barbour, *J. Supramol. Chem.*, 2001, **1**, 189.

4. G. M. Sheldrick, *Acta Crystallogr., Sect. A: Fundam. Crystallogr.*, 2008, **64**, 112.

The remaining H atoms were included in idealized geometric positions with  $U_{iso}=1.2U_{eq}$  of the atom to which they were attached ( $U_{iso}=1.5U_{eq}$  for methyl groups). Molecular configurations were compared to both the known chirality of the methylbenzylamine and estimated Flack parameters<sup>5</sup> and where applicable, atomic coordinates were inverted to achieve correct structural configurations. Hydrogen bond parameters are given in Table S2.

Table S1. Crystallographic data for diarylamide quasiracemates.

|                                                          | ( <i>R</i> )-Cl/( <i>S</i> )-Br <sup>1</sup>                      | (±)-Br <sup>1</sup>                  | ( <i>S</i> )-H/( <i>R</i> )-F                                  | ( <i>S</i> )-NO <sub>2</sub> /( <i>R</i> )-CF <sub>3</sub>                   |
|----------------------------------------------------------|-------------------------------------------------------------------|--------------------------------------|----------------------------------------------------------------|------------------------------------------------------------------------------|
| Crystal data                                             |                                                                   |                                      |                                                                |                                                                              |
| CCDC deposit no.                                         | LUNQIU                                                            | LUNQEQ                               | 1534590                                                        | 1534591                                                                      |
| Empirical formula                                        | C <sub>30</sub> H <sub>28</sub> BrClN <sub>2</sub> O <sub>2</sub> | C <sub>15</sub> H <sub>14</sub> NOBr | C <sub>30</sub> H <sub>14</sub> FN <sub>2</sub> O <sub>2</sub> | C <sub>31</sub> H <sub>28</sub> F <sub>3</sub> N <sub>3</sub> O <sub>3</sub> |
| Crystal System, space group                              | Monoclinic<br><i>P</i> 2 <sub>1</sub> (no. 4)                     | Orthorhombic<br><i>Pbca</i> (no. 61) | Triclinic<br><i>P</i> 1 (no. 1)                                | Monoclinic<br><i>P</i> 2 <sub>1</sub> (no. 4)                                |
| <i>M</i> <sub>r</sub>                                    | 563.90                                                            | 304.18                               | 468.55                                                         | 563.56                                                                       |
| <i>a</i> , Å                                             | 8.7790(8)                                                         | 9.4207(7)                            | 5.3540(2)                                                      | 8.3035(14)                                                                   |
| <i>b</i> , Å                                             | 17.699(2)                                                         | 16.361(1)                            | 8.3824(4)                                                      | 9.6853(13)                                                                   |
| <i>c</i> , Å                                             | 9.4652(9)                                                         | 18.348(2)                            | 13.8585(7)                                                     | 17.333(3)                                                                    |
| α, deg                                                   | 90                                                                | 90                                   | 96.477(3)                                                      | 90                                                                           |
| β, deg                                                   | 108.391(8)                                                        | 90                                   | 93.829(3)                                                      | 101.057(9)                                                                   |
| γ, deg                                                   | 90                                                                | 90                                   | 105.841(3)                                                     | 90                                                                           |
| <i>V</i> , (Å <sup>3</sup> )                             | 1395.6(2)                                                         | 2828.0(4)                            | 591.42(5)                                                      | 1368.0(4)                                                                    |
| <i>Z</i> , <i>Z'</i>                                     | 2, 1                                                              | 8, 1                                 | 1, 1                                                           | 2, 1                                                                         |
| <i>D</i> <sub>calc</sub> (g cm <sup>-3</sup> )           |                                                                   |                                      | 1.316                                                          | 1.368                                                                        |
| μ (mm <sup>-1</sup> ), rad. type                         |                                                                   |                                      | 0.705, Cu <i>K</i> α                                           | 0.882, Cu <i>K</i> α                                                         |
| <i>F</i> <sub>000</sub>                                  |                                                                   |                                      | 248                                                            | 588                                                                          |
| temp (K)                                                 |                                                                   |                                      | 100(2)                                                         | 100(2)                                                                       |
| Crystal form, color                                      |                                                                   |                                      | plate, colorless                                               | plate, colorless                                                             |
| Crystal size, mm                                         |                                                                   |                                      | 0.39 x 0.07 x 0.07                                             | 0.26 x 0.01 x 0.03                                                           |
| Data collection                                          |                                                                   |                                      |                                                                |                                                                              |
| Diffractometer                                           |                                                                   |                                      | Bruker Apex II                                                 | Bruker Apex II                                                               |
| <i>T</i> <sub>min</sub> / <i>T</i> <sub>max</sub>        |                                                                   |                                      | 0.653/0.753                                                    | 0.591/0.753                                                                  |
| No. of refls. (meas.,<br>uniqu., and obs.)               |                                                                   |                                      | 13271/3785/2730                                                | 20018/4899/3797                                                              |
| <i>R</i> <sub>int</sub>                                  |                                                                   |                                      | 0.0760                                                         | 0.0992                                                                       |
| σ <sub>max</sub> (°)                                     |                                                                   |                                      | 68.25                                                          | 68.22                                                                        |
| Refinement                                               |                                                                   |                                      |                                                                |                                                                              |
| <i>R</i> / <i>R</i> <sup>2</sup> <sub>ω</sub> (obs data) |                                                                   |                                      | 0.0668/0.1661                                                  | 0.0616/0.1599                                                                |
| <i>R</i> / <i>R</i> <sup>2</sup> <sub>ω</sub> (all data) |                                                                   |                                      | 0.0946/0.1886                                                  | 0.0787/0.1708                                                                |
| <i>S</i>                                                 |                                                                   |                                      | 1.045                                                          | 1.061                                                                        |
| No. of refls.                                            |                                                                   |                                      | 3785                                                           | 4899                                                                         |
| No. of parameters                                        |                                                                   |                                      | 406                                                            | 380                                                                          |
| Δρ <sub>max/min</sub> (e·Å <sup>-3</sup> )               |                                                                   |                                      | 0.638/-0.204                                                   | 0.341/-0.350                                                                 |
| <i>flack</i>                                             |                                                                   |                                      | -0.1(4)                                                        | 0.23(15)                                                                     |

<sup>5</sup> H. D. Flack, *Acta Crystallogr.*, 1983, **39**, 876-881.

Table S1. Crystallographic data for diarylamide quasiracemates. (Continued)

|                                                          | ( <i>R</i> )-CH <sub>3</sub> / <i>(S)</i> -CF <sub>3</sub>                   | ( <i>R</i> )-NO <sub>2</sub> / <i>(S)</i> -Br                   | ( <i>R</i> )-CF <sub>3</sub> / <i>(S)</i> -I                                   | ( <i>S</i> )-OMe                                                               |
|----------------------------------------------------------|------------------------------------------------------------------------------|-----------------------------------------------------------------|--------------------------------------------------------------------------------|--------------------------------------------------------------------------------|
| Crystal data                                             |                                                                              |                                                                 |                                                                                |                                                                                |
| CCDC deposit no.                                         | 1534592                                                                      | 1534593                                                         | 1534594                                                                        | 1534589                                                                        |
| Empirical formula                                        | C <sub>32</sub> H <sub>31</sub> F <sub>3</sub> N <sub>2</sub> O <sub>2</sub> | C <sub>30</sub> H <sub>28</sub> BrN <sub>3</sub> O <sub>4</sub> | C <sub>31</sub> H <sub>28</sub> F <sub>3</sub> IN <sub>2</sub> O <sub>2</sub>  | C <sub>16</sub> H <sub>17</sub> NO <sub>2</sub>                                |
| Crystal System, space group                              | Monoclinic<br><i>P</i> 2 <sub>1</sub> (no. 4)                                | Monoclinic<br><i>P</i> 2 <sub>1</sub> (no. 4)                   | Orthorhombic<br><i>P</i> 2 <sub>1</sub> 2 <sub>1</sub> 2 <sub>1</sub> (no. 19) | Orthorhombic<br><i>P</i> 2 <sub>1</sub> 2 <sub>1</sub> 2 <sub>1</sub> (no. 19) |
| <i>M</i> <sub>r</sub>                                    | 532.59                                                                       | 574.46                                                          | 644.45                                                                         | 255.30                                                                         |
| <i>a</i> , Å                                             | 8.7183(13)                                                                   | 8.2953(5)                                                       | 9.4943(2)                                                                      | 5.8757(10)                                                                     |
| <i>b</i> , Å                                             | 18.007(2)                                                                    | 9.5761(5)                                                       | 16.1705(4)                                                                     | 14.464(2)                                                                      |
| <i>c</i> , Å                                             | 9.5051(11)                                                                   | 17.2423(9)                                                      | 18.3454(5)                                                                     | 15.887(3)                                                                      |
| $\alpha$ , deg                                           | 90                                                                           | 90                                                              | 90                                                                             | 90                                                                             |
| $\beta$ , deg                                            | 106.811(8)                                                                   | 101.342(3)                                                      | 90                                                                             | 90                                                                             |
| $\gamma$ , deg                                           | 90                                                                           | 90                                                              | 90                                                                             | 90                                                                             |
| <i>V</i> , (Å <sup>3</sup> )                             | 1428.4(3)                                                                    | 1342.92(13)                                                     | 2816.52(12)                                                                    | 1350.2(4)                                                                      |
| <i>Z</i> , <i>Z'</i>                                     | 2, 1                                                                         | 2, 1                                                            | 4, 1                                                                           | 4, 1                                                                           |
| <i>D</i> <sub>calc</sub> (g cm <sup>-3</sup> )           | 1.572                                                                        | 1.421                                                           | 1.520                                                                          | 1.256                                                                          |
| $\mu$ (mm <sup>-1</sup> ), rad. type                     | 0.748, Cu <i>K</i> $\alpha$                                                  | 2.420, Cu <i>K</i> $\alpha$                                     | 9.367, Cu <i>K</i> $\alpha$                                                    | 0.661, Cu <i>K</i> $\alpha$                                                    |
| <i>F</i> <sub>000</sub>                                  | 560                                                                          | 592                                                             | 1296                                                                           | 544                                                                            |
| temp (K)                                                 | 100(2)                                                                       | 100(2)                                                          | 100(2)                                                                         | 100(2)                                                                         |
| Crystal form, color                                      | plate, colorless                                                             | plate, colorless                                                | plate, colorless                                                               | block, colorless                                                               |
| Crystal size, mm                                         | 0.44 x 0.17 x 0.10                                                           | 0.15 x 0.11 x 0.03                                              | 0.15 x 0.15 x 0.10                                                             | 0.31 x 0.15 x 0.06                                                             |
| Data collection                                          |                                                                              |                                                                 |                                                                                |                                                                                |
| Diffractometer                                           | Bruker Apex II                                                               | Bruker Apex II                                                  | Bruker Apex II                                                                 | Bruker Apex II                                                                 |
| <i>T</i> <sub>min</sub> / <i>T</i> <sub>max</sub>        | 0.591/0.753                                                                  | 0.587/0.753                                                     | 0.532/0.753                                                                    | 0.669/0.753                                                                    |
| No. of refls. (meas.,<br>uniqu., and obs.)               | 20723/5088/3596                                                              | 20609/4825/3810                                                 | 43195/5159/4723                                                                | 5676/2162/1911                                                                 |
| <i>R</i> <sub>int</sub>                                  | 0.0734                                                                       | 0.1097                                                          | 0.0765                                                                         | 0.0381                                                                         |
| $\sigma$ <sub>max</sub> (°)                              | 68.20                                                                        | 68.25                                                           | 68.23                                                                          | 68.22                                                                          |
| Refinement                                               |                                                                              |                                                                 |                                                                                |                                                                                |
| <i>R</i> / <i>R</i> <sup>2</sup> <sub>w</sub> (obs data) | 0.0515/0.1446                                                                | 0.0737/0.1536                                                   | 0.0277/0.0582                                                                  | 0.0371/0.0852                                                                  |
| <i>R</i> / <i>R</i> <sup>2</sup> <sub>w</sub> (all data) | 0.0712/0.1662                                                                | 0.0967/0.1652                                                   | 0.0328/0.0612                                                                  | 0.0435/0.0893                                                                  |
| <i>S</i>                                                 | 1.073                                                                        | 1.088                                                           | 1.004                                                                          | 1.060                                                                          |
| No. of refls.                                            | 5088                                                                         | 4825                                                            | 5159                                                                           | 2162                                                                           |
| No. of parameters                                        | 363                                                                          | 351                                                             | 362                                                                            | 178                                                                            |
| $\Delta\rho_{\text{max/min}}$ (e·Å <sup>-3</sup> )       | 0.157/-0.172                                                                 | 1.047/-0.821                                                    | 0.624/-0.507                                                                   | 0.172/-0.161                                                                   |
| <i>flack</i>                                             | 0.0(2)                                                                       | 0.10(2)                                                         | -0.005(3)                                                                      | 0.0(2)                                                                         |

Table S2. Hydrogen Bond Parameters for Diarylamide Quasiracemate Structures.

| Compound                                 | D–H...A                       | D–H (Å)   | H...A (Å) | D...A (Å) | D–H...A (°) |
|------------------------------------------|-------------------------------|-----------|-----------|-----------|-------------|
| (S)-H/(R)-H                              | N1A–H1A...O1A <sup>i</sup>    | 0.87(3)   | 2.33(3)   | 3.143(6)  | 156(5)      |
|                                          | N1B–H1B...O1B <sup>ii</sup>   | 0.87(3)   | 2.32(3)   | 3.122(7)  | 154(5)      |
| (S)-NO <sub>2</sub> /(R)-CF <sub>3</sub> | N1–H1...O1 <sup>iii</sup>     | 0.86(3)   | 2.02(3)   | 2.870(6)  | 170(9)      |
|                                          | N1A–H1A...O1A <sup>iv</sup>   | 0.86(3)   | 2.02(3)   | 2.855(6)  | 164(6)      |
| (R)-CH <sub>3</sub> /(S)-CF <sub>3</sub> | N1A–H1A...O1 <sup>v</sup>     | 0.85(2)   | 2.08(3)   | 2.911(5)  | 164(4)      |
|                                          | N1–H1...O1A <sup>vi</sup>     | 0.87(2)   | 2.11(3)   | 2.923(5)  | 156(5)      |
| (R)-NO <sub>2</sub> /(S)-Br              | N1–H1...O1 <sup>vii</sup>     | 0.85(3)   | 1.97(4)   | 2.802(11) | 166(12)     |
|                                          | N1A–H1A...O1A <sup>viii</sup> | 0.84(2)   | 2.06(3)   | 2.871(11) | 164(10)     |
| (R)-CF <sub>3</sub> /(S)-I               | N1–H1...O1A <sup>v</sup>      | 0.82(3)   | 2.15(3)   | 2.946(5)  | 163(5)      |
|                                          | N1A–H1A...O1 <sup>ii</sup>    | 0.84(2)   | 2.13(3)   | 2.948(5)  | 164(4)      |
| (S)-OMe                                  | N1–H1...O2 <sup>v</sup>       | 0.883(19) | 1.94(2)   | 2.669(3)  | 139(3)      |

Symmetry codes: (i)  $x-1, y, z$ ; (ii)  $x+1, y, z$ ; (iii)  $-x, y-0.5, -z$ ; (iv)  $-x+1, y+0.5, -z+1$ ; (v)  $x, y, z$ ; (vi)  $x, y, z-1$ ; (vii)  $-x+1, y-0.5, -z$ ; (viii)  $2-x, 0.5+y, 1-z$

## S5. $^1\text{H}$ NMR Overlays

$^1\text{H}$ -NMR (acetone- $d_6$ ) spectra collected on quasiracemic samples were retrieved from the melt.

(*S*)-Cl/(*R*)-Br Quasiracemate

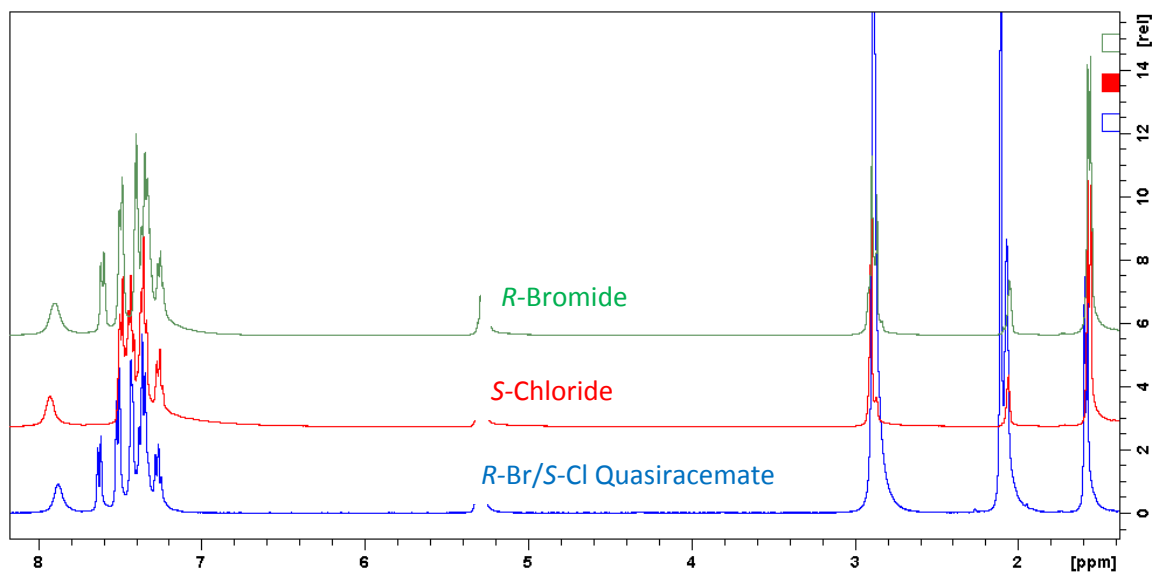

(*S*)-NO<sub>2</sub>/(*R*)-CF<sub>3</sub> Quasiracemate

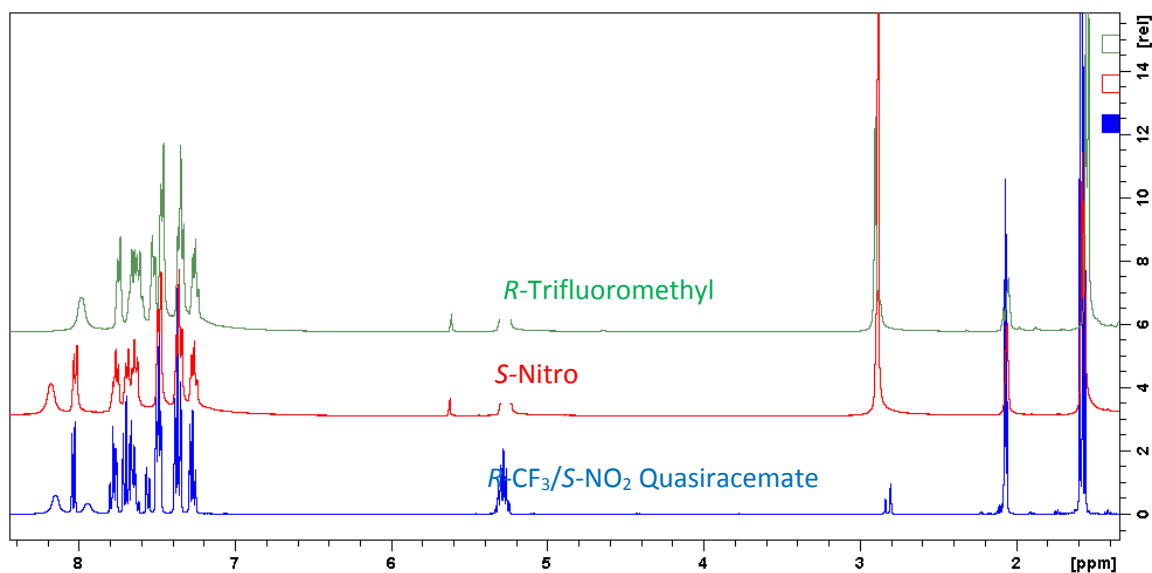

(*S*)-Me/(*R*)-CF<sub>3</sub> Quasiracemate

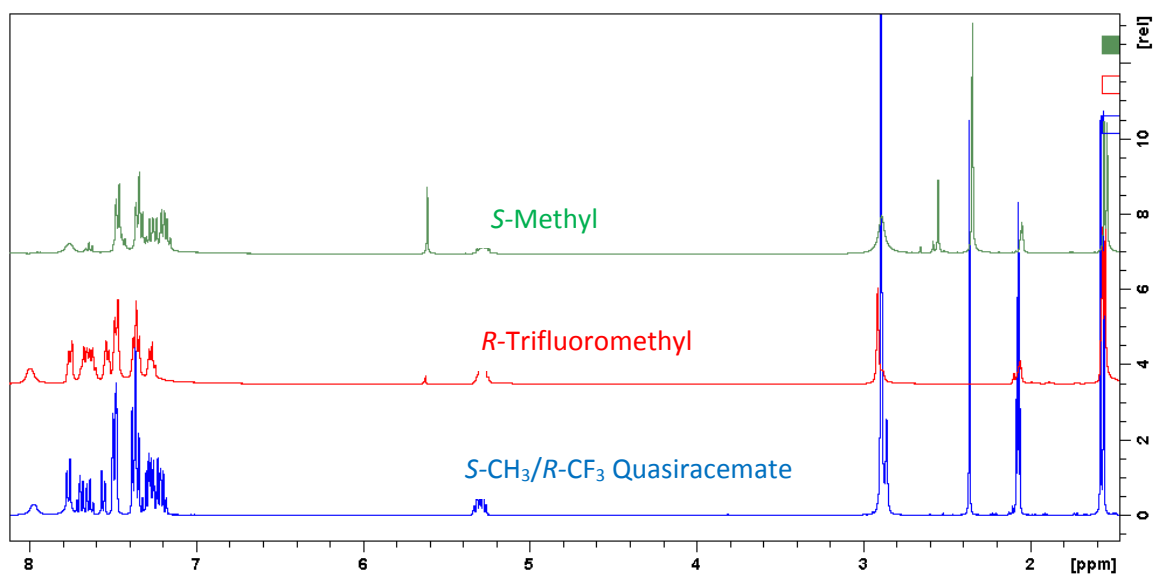

(*S*)-Br/(*R*)-CF<sub>3</sub> Quasiracemate

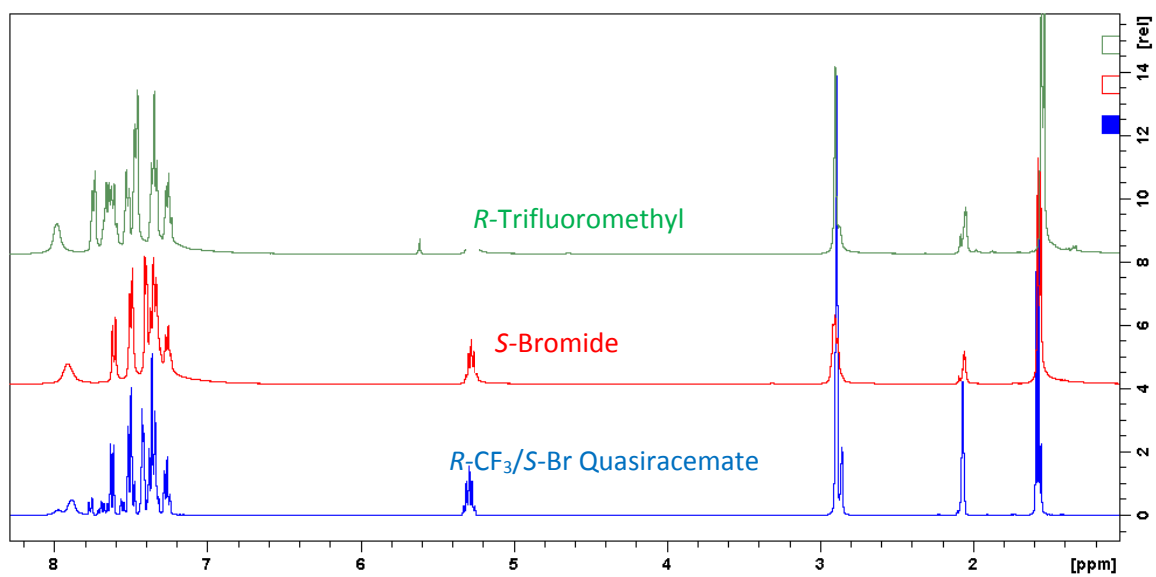

(S)-Cl/(R)-I Quasiracemate

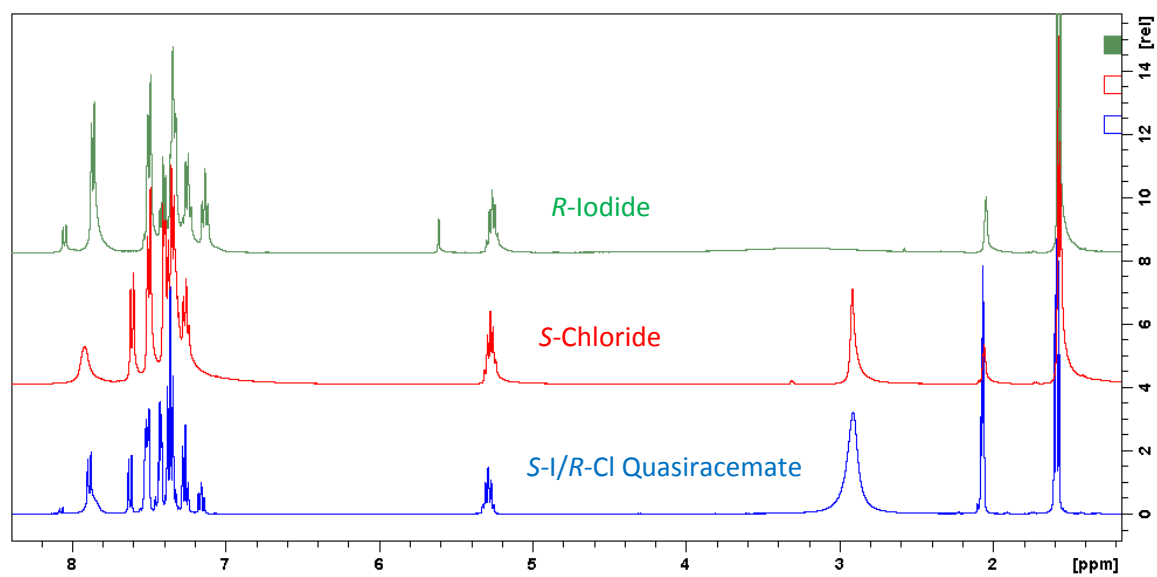

## S6 – Functional Group and Chemical Framework Volume and Surface Area Comparisons

Functional group volume and surface area approximations were taken from previously reported values.<sup>6</sup> The following table provides percent increases of the volume and surface areas corresponding to both functional group and the 2-substituted diarylamide molecular frameworks.

### Volume Comparisons

| Group<br>Volume (Å <sup>3</sup> ) |                               |        |       |       |       |                 |                 |       |                 |                  |       |                               |  |
|-----------------------------------|-------------------------------|--------|-------|-------|-------|-----------------|-----------------|-------|-----------------|------------------|-------|-------------------------------|--|
| 5.9                               | H                             |        |       |       |       |                 |                 |       |                 |                  |       |                               |  |
| 7.8                               | F                             | 32.2   |       |       |       |                 |                 |       |                 |                  |       |                               |  |
| 19.6                              | Cl                            | 232.2  | 151.3 |       |       |                 |                 |       |                 |                  |       |                               |  |
| 21.0                              | CN                            | 255.9  | 169.2 | 7.1   |       |                 |                 |       |                 |                  |       |                               |  |
| 22.3                              | CH <sub>3</sub>               | 278.0  | 185.9 | 13.8  | 6.2   |                 |                 |       |                 |                  |       |                               |  |
| 23.2                              | NO <sub>2</sub>               | 293.2  | 197.4 | 18.4  | 10.5  | 4.0             |                 |       |                 |                  |       |                               |  |
| 27.6                              | Br                            | 367.8  | 253.8 | 40.8  | 31.4  | 23.8            | 19.0            |       |                 |                  |       |                               |  |
| 28.9                              | CF <sub>3</sub>               | 389.8  | 270.5 | 47.4  | 37.6  | 29.6            | 24.6            | 4.7   |                 |                  |       |                               |  |
| 32.6                              | OCH <sub>3</sub>              | 452.5  | 317.9 | 66.3  | 55.2  | 46.2            | 40.5            | 18.1  | 12.8            |                  |       |                               |  |
| 34.6                              | I                             | 486.4  | 343.6 | 76.5  | 64.8  | 55.2            | 49.1            | 25.4  | 19.7            | 6.1              |       |                               |  |
| 82.9                              | C <sub>6</sub> H <sub>5</sub> | 1305.1 | 962.8 | 323.0 | 294.8 | 271.7           | 257.3           | 200.4 | 186.9           | 154.3            | 139.6 |                               |  |
|                                   |                               | H      | F     | Cl    | CN    | CH <sub>3</sub> | NO <sub>2</sub> | Br    | CF <sub>3</sub> | OCH <sub>3</sub> | I     | C <sub>6</sub> H <sub>5</sub> |  |

| Diarylamide<br>Molecular<br>Volume (Å <sup>3</sup> ) |                               |      |      |      |      |                 |                 |      |                 |                  |      |                               |  |
|------------------------------------------------------|-------------------------------|------|------|------|------|-----------------|-----------------|------|-----------------|------------------|------|-------------------------------|--|
| 221.9                                                | H                             |      |      |      |      |                 |                 |      |                 |                  |      |                               |  |
| 223.8                                                | F                             | 0.9  |      |      |      |                 |                 |      |                 |                  |      |                               |  |
| 235.6                                                | Cl                            | 6.2  | 5.3  |      |      |                 |                 |      |                 |                  |      |                               |  |
| 237.0                                                | CN                            | 6.8  | 5.9  | 0.6  |      |                 |                 |      |                 |                  |      |                               |  |
| 238.3                                                | CH <sub>3</sub>               | 7.4  | 6.5  | 1.1  | 0.5  |                 |                 |      |                 |                  |      |                               |  |
| 239.2                                                | NO <sub>2</sub>               | 7.8  | 6.9  | 1.5  | 0.9  | 0.4             |                 |      |                 |                  |      |                               |  |
| 243.6                                                | Br                            | 9.8  | 8.8  | 3.4  | 2.8  | 2.2             | 1.8             |      |                 |                  |      |                               |  |
| 244.9                                                | CF <sub>3</sub>               | 10.4 | 9.4  | 3.9  | 3.3  | 2.8             | 2.4             | 0.5  |                 |                  |      |                               |  |
| 248.6                                                | OCH <sub>3</sub>              | 12.0 | 11.1 | 5.5  | 4.9  | 4.3             | 3.9             | 2.1  | 1.5             |                  |      |                               |  |
| 250.6                                                | I                             | 12.9 | 12.0 | 6.4  | 5.7  | 5.2             | 4.8             | 2.9  | 2.3             | 0.8              |      |                               |  |
| 298.9                                                | C <sub>6</sub> H <sub>5</sub> | 34.7 | 33.6 | 26.9 | 26.1 | 25.4            | 25.0            | 22.7 | 22.0            | 20.2             | 19.3 |                               |  |
|                                                      |                               | H    | F    | Cl   | CN   | CH <sub>3</sub> | NO <sub>2</sub> | Br   | CF <sub>3</sub> | OCH <sub>3</sub> | I    | C <sub>6</sub> H <sub>5</sub> |  |

6. A. Gavezzotti, *J. Am. Chem. Soc.*, 1985, **107**, 962. A. Gavezzotti, *J. Am. Chem. Soc.*, 1983, **105**, 5220.

## Surface Area Comparisons

### Group Surface

Areas (Å<sup>2</sup>)

| Areas (Å <sup>2</sup> ) |                               |        |       |       |       |                 |                 |       |                 |                  |       |                               |
|-------------------------|-------------------------------|--------|-------|-------|-------|-----------------|-----------------|-------|-----------------|------------------|-------|-------------------------------|
| 6.8                     | H                             |        |       |       |       |                 |                 |       |                 |                  |       |                               |
| 12.1                    | F                             | 77.9   |       |       |       |                 |                 |       |                 |                  |       |                               |
| 29.0                    | Cl                            | 326.5  | 139.7 |       |       |                 |                 |       |                 |                  |       |                               |
| 32.2                    | CN                            | 373.5  | 166.1 | 11.0  |       |                 |                 |       |                 |                  |       |                               |
| 33.4                    | CH <sub>3</sub>               | 391.2  | 176.0 | 15.2  | 3.7   |                 |                 |       |                 |                  |       |                               |
| 37.0                    | NO <sub>2</sub>               | 444.1  | 205.8 | 27.6  | 14.9  | 10.8            |                 |       |                 |                  |       |                               |
| 37.1                    | Br                            | 445.6  | 206.6 | 27.9  | 15.2  | 11.1            | 0.3             |       |                 |                  |       |                               |
| 37.3                    | CF <sub>3</sub>               | 448.5  | 208.3 | 28.6  | 15.8  | 11.7            | 0.8             | 0.5   |                 |                  |       |                               |
| 40.1                    | OCH <sub>3</sub>              | 489.7  | 231.4 | 38.3  | 24.5  | 20.1            | 8.4             | 8.1   | 7.5             |                  |       |                               |
| 45.0                    | I                             | 561.8  | 271.9 | 55.2  | 39.8  | 34.7            | 21.6            | 21.3  | 20.6            | 12.2             |       |                               |
| 94.9                    | C <sub>6</sub> H <sub>5</sub> | 1295.6 | 684.3 | 227.2 | 194.7 | 184.1           | 156.5           | 155.8 | 154.4           | 136.7            | 110.9 |                               |
|                         |                               | H      | F     | Cl    | CN    | CH <sub>3</sub> | NO <sub>2</sub> | Br    | CF <sub>3</sub> | OCH <sub>3</sub> | I     | C <sub>6</sub> H <sub>5</sub> |

### Diarylamide

### Molecular Surface

Areas ( $\text{\AA}^3$ )

| Areas (a.u.) |                               |      |      |      |      |                 |                 |      |                 |                  |      |                               |
|--------------|-------------------------------|------|------|------|------|-----------------|-----------------|------|-----------------|------------------|------|-------------------------------|
| 302.8        | H                             |      |      |      |      |                 |                 |      |                 |                  |      |                               |
| 308.1        | F                             | 1.8  |      |      |      |                 |                 |      |                 |                  |      |                               |
| 325.0        | Cl                            | 7.3  | 5.5  |      |      |                 |                 |      |                 |                  |      |                               |
| 328.2        | CN                            | 8.4  | 6.5  | 1.0  |      |                 |                 |      |                 |                  |      |                               |
| 329.4        | CH <sub>3</sub>               | 8.8  | 6.9  | 1.4  | 0.4  |                 |                 |      |                 |                  |      |                               |
| 333.0        | NO <sub>2</sub>               | 10.0 | 8.1  | 2.5  | 1.5  | 1.1             |                 |      |                 |                  |      |                               |
| 333.1        | Br                            | 10.0 | 8.1  | 2.5  | 1.5  | 1.1             | 0.0             |      |                 |                  |      |                               |
| 333.3        | CF <sub>3</sub>               | 10.1 | 8.2  | 2.6  | 1.6  | 1.2             | 0.1             | 0.1  |                 |                  |      |                               |
| 336.1        | OCH <sub>3</sub>              | 11.0 | 9.1  | 3.4  | 2.4  | 2.0             | 0.9             | 0.9  | 0.8             |                  |      |                               |
| 341.0        | I                             | 12.6 | 10.7 | 4.9  | 3.9  | 3.5             | 2.4             | 2.4  | 2.3             | 1.5              |      |                               |
| 390.9        | C <sub>6</sub> H <sub>5</sub> | 29.1 | 26.9 | 20.3 | 19.1 | 18.7            | 17.4            | 17.4 | 17.3            | 16.3             | 14.6 |                               |
|              |                               | H    | F    | Cl   | CN   | CH <sub>3</sub> | NO <sub>2</sub> | Br   | CF <sub>3</sub> | OCH <sub>3</sub> | I    | C <sub>6</sub> H <sub>5</sub> |
